# Supplementary material
Source: publisher figshare collection journal article supplement (https://springernature.figshare.com/ndownloader/files/7349417)
Supplement: Supplementary file [file 7349417]

# Discovery of large genomic inversions using long range information

Marzieh Eslami Rasekh<sup>1</sup>, Giorgia Chiatante<sup>2</sup>, Mattia Miroballo<sup>2</sup>, Joyce Tang<sup>3</sup>,  
Mario Ventura<sup>2</sup>, Chris T. Amemiya<sup>3</sup>, Evan E. Eichler<sup>4</sup>, Francesca Antonacci<sup>2</sup> and Can Alkan<sup>1</sup>

<sup>1</sup>Department of Computer Engineering, Bilkent University, 06800 Ankara, Turkey

<sup>2</sup>Department of Biology, University of Bari, Via Orabona 4, 70125 Bari, Italy

<sup>3</sup>Benaroya Research Institute, 1201 Ninth Avenue, 98101 Seattle, WA, United States

<sup>4</sup>Department of Genome Sciences and Howard Hughes Medical Institute, University of Washington, 3720 15th Avenue NE, 98195 Seattle, WA, United States

## Contents

|      |                                                                                 |    |
|------|---------------------------------------------------------------------------------|----|
| 1    | Supplementary notes                                                             | 2  |
| 1.1  | Probability of inversion discovery . . . . .                                    | 2  |
| 1.2  | Variables and parameters . . . . .                                              | 3  |
| 1.3  | Probability of clone overlap . . . . .                                          | 4  |
| 1.4  | Clone reconstruction rate . . . . .                                             | 7  |
| 1.5  | Parameter optimization of clone reconstruction . . . . .                        | 7  |
| 1.6  | Parameter optimization of the maximal quasi-clique . . . . .                    | 7  |
| 1.7  | The set cover approximation problem . . . . .                                   | 8  |
| 1.8  | Other structural variation split clone signatures . . . . .                     | 10 |
| 1.9  | Correctness of VALOR on simulated data . . . . .                                | 11 |
| 1.10 | Robustness to other structural variations . . . . .                             | 13 |
| 1.11 | Comparison to other tools . . . . .                                             | 15 |
| 1.12 | Robustness to segmental duplications . . . . .                                  | 15 |
| 1.13 | VarSim simulation 1: testing prediction performance vs. inversion size. . . . . | 17 |
| 1.14 | VarSim simulation 2: testing different parameters for WGS-based tools. . . . .  | 18 |
| 1.15 | Statistics on the real data of the NA12878 individual . . . . .                 | 21 |
| 1.16 | Inversions predicted on the real data of the NA12878 individual . . . . .       | 23 |
| 1.17 | FISH validations . . . . .                                                      | 25 |
| 1.18 | Extra files . . . . .                                                           | 26 |

# 1 Supplementary notes

## 1.1 Probability of inversion discovery

Assume there is an inversion with breakpoints B1 and B2. The probability of picking a clone of length clone.length uniformly from the genome of length genome.length such that it will pass one of the breakpoints with at least the distance of one paired-end read which is PE.length from the breakpoint is given as:

$$P1 = P(\text{clone.start} \in [B1 - \text{clone.length} + \text{PE.length}, B1 - \text{PE.length}]) = \frac{\text{clone.length} - 2\text{PE.length}}{\text{genome.length}} \quad (1)$$

Now we give the probability of having a clone of size clone.length which is ideally obtained by a Gaussian distribution with mean of clone. $\mu$  and standard deviation of clone. $\sigma$ . The probability is approximated from the truncated normal distribution.

$$\begin{aligned} P2 = P(\text{clone}|\text{clone.length}) &= \int_{x=\text{clone.length}-1}^{\text{clone.length}} \frac{\frac{1}{\text{clone}.\sigma} \Phi\left(\frac{x-\text{clone}.\mu}{\text{clone}.\sigma}\right)}{\Phi\left(\frac{\text{genome.length}-\text{clone}.\mu}{\text{clone}.\sigma}\right) - \Phi\left(\frac{-\text{clone}.\mu}{\text{clone}.\sigma}\right)} \\ &= \frac{\int_{x=\text{clone.length}-1}^{\text{clone.length}} e^{-\frac{(x-\text{clone}.\mu)^2}{2}}}{\text{clone}.\sigma \left( e^{-\frac{(\text{genome.length}-\text{clone}.\mu)^2}{2}} - e^{-\frac{-\text{clone}.\mu^2}{2}} \right)} \end{aligned} \quad (2)$$

Since S1 and S2 are independent, the probability of a clone passing B1 is:

$$P3 = P(S1|S2) = P(S1) \times P(S2) \quad (3)$$

For all clones, we require at least one clone to cover B1, which means one occurrence of S3 in n times (Bernoulli). This probability is:

$$P4 = 1 - (1 - P3)^n \quad (4)$$

where n is the number of clones and can be computed by:

$$n = \frac{\text{genome.length} \times \text{physical.coverage}}{\text{clone}.\mu} \quad (5)$$

Now we define P5 as the probability of having one clone covering B1 and another covering B2 when  $B2 - B1 + 1 \geq \text{clone.length}$  (given that B1 and B2 are far enough from each other) is:

$$P5 = P4(n) \times P4(n-1) = (1 - (1 - P3)^n) \cdot (1 - (1 - P3)^{n-1}) \quad (6)$$

Now we should calculate the probability of having two clones in the same pool. Assuming that the procedure of picking clones is independent from each other and the distribution is uniform:

$$P6 = P(\text{clone}_i \in \text{pool}_k \ \& \ \text{clone}_j \in \text{pool}_k) = \frac{1}{\text{pools.count}^2} \quad (7)$$

Finally we can define the probability of a **findable inversion** which means there is a clone passing B1 and another passing B2 while these two clones do not overlap:

$$P7 = P(\text{findable inversion}) = P5 \times P6 = \frac{(1 - (1 - P3)^n) \cdot (1 - (1 - P3)^{n-1})}{\text{pools.count}^2} \quad (8)$$

Here we have the probability of having clones such that a given inversion is findable.

## 1.2 Variables and parameters

In order to run VALOR, **the user only needs to specify the minimum and maximum inversion size to be detected**. All other parameters are automatically calculated based on the data set. Supplementary Table 1 explains the meaning and suggested value of each variable.

Supplementary Table 1: VALOR parameters

| Paired-end read information                  |                                                                                                                                                        |                                                     |
|----------------------------------------------|--------------------------------------------------------------------------------------------------------------------------------------------------------|-----------------------------------------------------|
| Parameter                                    | Explanation                                                                                                                                            | Value                                               |
| READ_LENGTH                                  | Length of each read                                                                                                                                    | <i>from data</i>                                    |
| FRAG_MAX                                     | Maximum fragment size from the paired-end reads in mapping                                                                                             | $\mu_{\text{fragment}} + 3\sigma_{\text{fragment}}$ |
| FRAG_MIN                                     | Minimum fragment size from the paired-end reads in mapping                                                                                             | $\mu_{\text{fragment}} - 3\sigma_{\text{fragment}}$ |
| Clone reconstruction parameters <sup>1</sup> |                                                                                                                                                        |                                                     |
| Parameter                                    | Explanation                                                                                                                                            | Value                                               |
| WINDOW_SIZE                                  | The minimum window size to look for potential clone seeds                                                                                              | $\mu_{\text{fragment}}$                             |
| MIN_COVERAGE                                 | The minimum coverage required for a window to be accepted as a clone seed                                                                              | 50-60%                                              |
| EXTENSION                                    | The distant from the edges of the clone seed to be extended to any fragment found, should be set to max fragment size                                  | FRAG_MAX                                            |
| Clone information for split clone discovery  |                                                                                                                                                        |                                                     |
| Parameter                                    | Explanation                                                                                                                                            | Value                                               |
| CLONE_MEAN                                   | The expected mean size of clones (i.e. 150 Kbp for BAC).                                                                                               | <i>from data</i>                                    |
| CLONE_STD_DEV                                | The expected standard deviation of the clones.                                                                                                         | <i>from data</i>                                    |
| CLONE_MAX                                    | The maximum possible clone length                                                                                                                      | $\mu_{\text{clone}} + 3\sigma_{\text{clone}}$       |
| CLONE_MIN                                    | The minimum possible clone length                                                                                                                      | $\mu_{\text{clone}} - 3\sigma_{\text{clone}}$       |
| Inversion information                        |                                                                                                                                                        |                                                     |
| Parameter                                    | Explanation                                                                                                                                            | Value                                               |
| INV_MIN_SIZE                                 | Minimum inversion size to find                                                                                                                         | <i>user specific</i>                                |
| INV_MAX_SIZE                                 | Maximum inversion size to find                                                                                                                         | <i>user specific</i>                                |
| INV_GAP                                      | The distance between two split clones, should allow for one normal clone size                                                                          | $\mu_{\text{clone}}$                                |
| INV_OVERLAP                                  | The overlap allowed for split clones, should be set according to maximum fragment size for smaller inversions and to the size of a clone for > 500 Kbp | $-1 \times \text{INV\_GAP}$                         |
| INV_READ_LIMIT                               | The distance allowed around the split clones to find supporting reads, should allow for maximum fragment size                                          | FRAG_MAX                                            |
| Quasi-clique parameters <sup>2</sup>         |                                                                                                                                                        |                                                     |
| Parameter                                    | Explanation                                                                                                                                            | Value                                               |
| QCLIQUE_LAMBDA                               | The minimum percentage of k-clique nodes which should be present in the subgraph to considered as a quasi-clique                                       | 0.5                                                 |
| QCLIQUE_GAMMA                                | The minimum percentage of k-clique edges which should be present in the subgraph to considered as a quasi-clique                                       | 0.6                                                 |
| QCLIQUE_TABU                                 | Number of rounds a node can be removed and added to a quasi-clique                                                                                     | $ \text{InversionGraph} /10$                        |

<sup>1</sup> See optimized parameters in section 1.5. <sup>2</sup> See optimized parameters in section 1.6.

### 1.3 Probability of clone overlap

The probability of clones not overlapping in each pool is expected to be respectively low. However some inferred clones of size larger than expected were observed which we suspected them to be due to overlaps in some pools. The computational complexity of calculating the exact probability of overlap in a given set pool is too expensive ( $O(n^{nm})$  where  $n$  is the number of clones and  $m$  is the length of the genome). In the real data of NA12878, there are approximately 230, 389, and 153 clones in each pool of set 1, 2, and 3, respectively. To evaluate the probability of clone overlap for each cutoff (number of clones overlapping), for maximum  $2^{63} - 1$  test cases we extensively simulated a number of random clones in 288 pools (from normal distribution of  $\mu=137$  Kbp and  $\sigma=40$  Kbp with cutoff 125 Kbp and 175 Kbp) and counted the average number of times there were  $x$  overlaps (for  $x=1$  to total number of clones). Each test was stopped when the average number became stable to the thousands for 1000 consequent runs. This was repeated 1000 times and averaged for each cutoff (number of clones overlapping). The results are presented in the Supplementary Tables 2, 3, and 4 and Supplementary Figures 1,2, and 3. Figures were obtained by RapidMiner<sup>1</sup>.

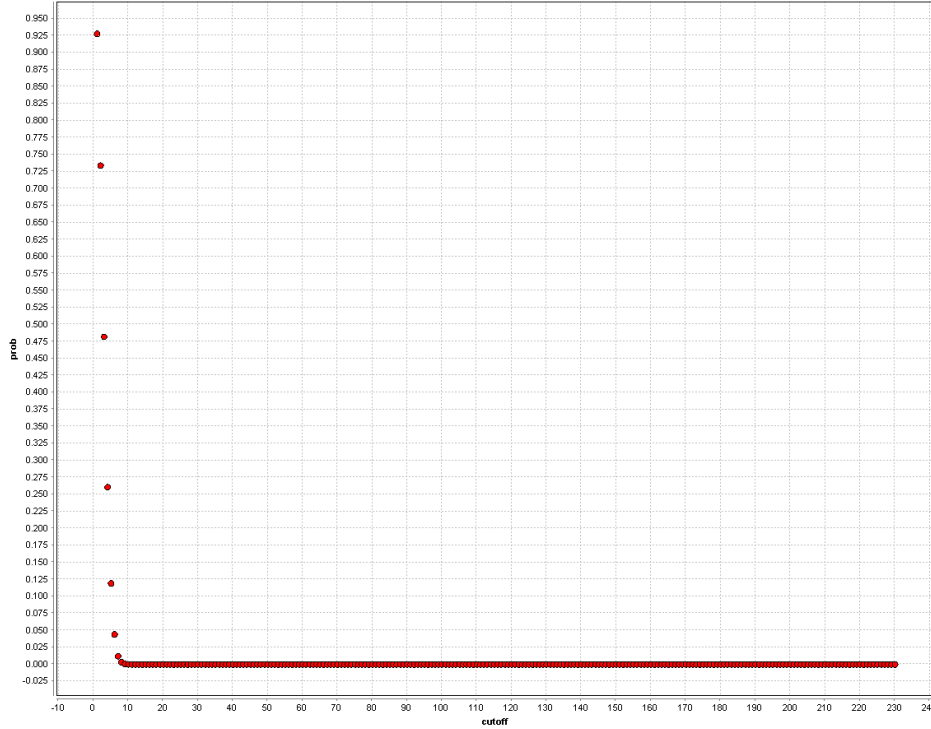

Supplementary Figure 1: Probability of overlapping for each number of clones estimated for set1 of pooled clone data of NA12878 with 230 clones per pool.

Supplementary Table 2: Exact values of overlapping probabilities estimated for set 1 of pooled clone data of NA12878 with 230 clones per pool.

| cutoff | prob    |
|--------|---------|
| 1      | 92.789% |
| 2      | 73.407% |
| 3      | 48.212% |
| 4      | 26.082% |
| 5      | 11.916% |
| 6      | 4.412%  |
| 7      | 1.210%  |
| 8      | 0.315%  |
| 9      | 0.072%  |
| 10     | 0.021%  |
| 11     | 0.009%  |
| 12     | 0.001%  |
| 13-230 | 0.00%   |

<sup>1</sup><https://rapidminer.com/>

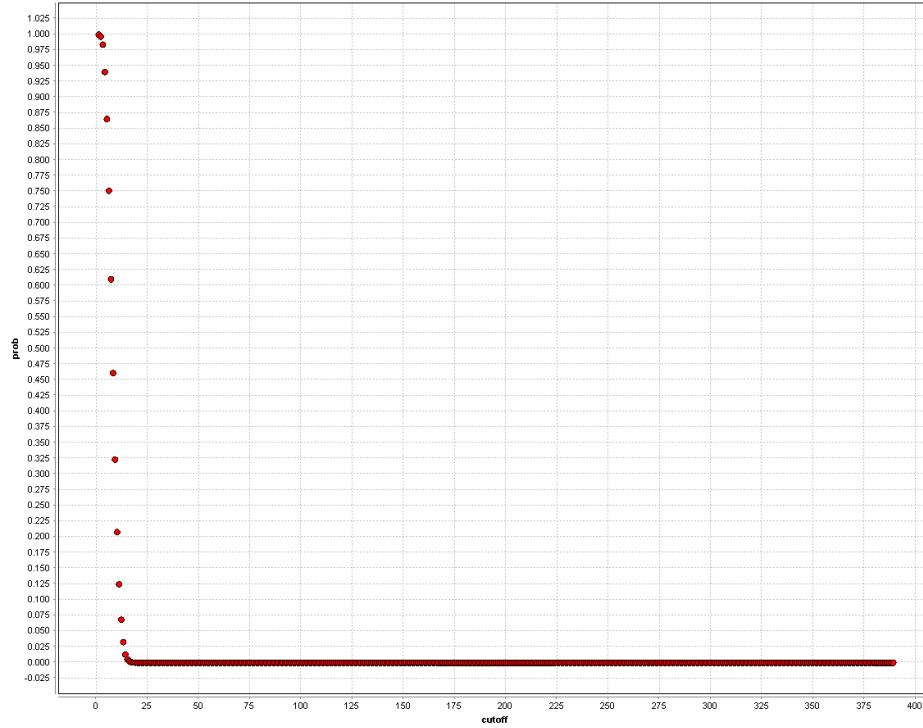

Supplementary Figure 2: Probability of overlapping for each number of clones estimated for set2 of pooled clone data of NA12878 with 389 clones per pool.

Supplementary Table 3: Exact values of of overlapping probabilities estimated for set2 of pooled clone data of NA12878 with 389 clones per pool.

| cutoff | prob    |
|--------|---------|
| 1      | 99.967% |
| 2      | 99.669% |
| 3      | 98.380% |
| 4      | 94.057% |
| 5      | 86.551% |
| 6      | 75.149% |
| 7      | 61.036% |
| 8      | 46.090% |
| 9      | 32.326% |
| 10     | 20.777% |
| 11     | 12.479% |
| 12     | 6.847%  |
| 13     | 3.280%  |
| 14     | 1.306%  |
| 15     | 0.549%  |
| 16     | 0.240%  |
| 17     | 0.075%  |
| 18     | 0.025%  |
| 19     | 0.011%  |
| 20     | 0.004%  |
| 21     | 0.001%  |
| 22     | 0.001%  |
| 23-389 | 0.00%   |

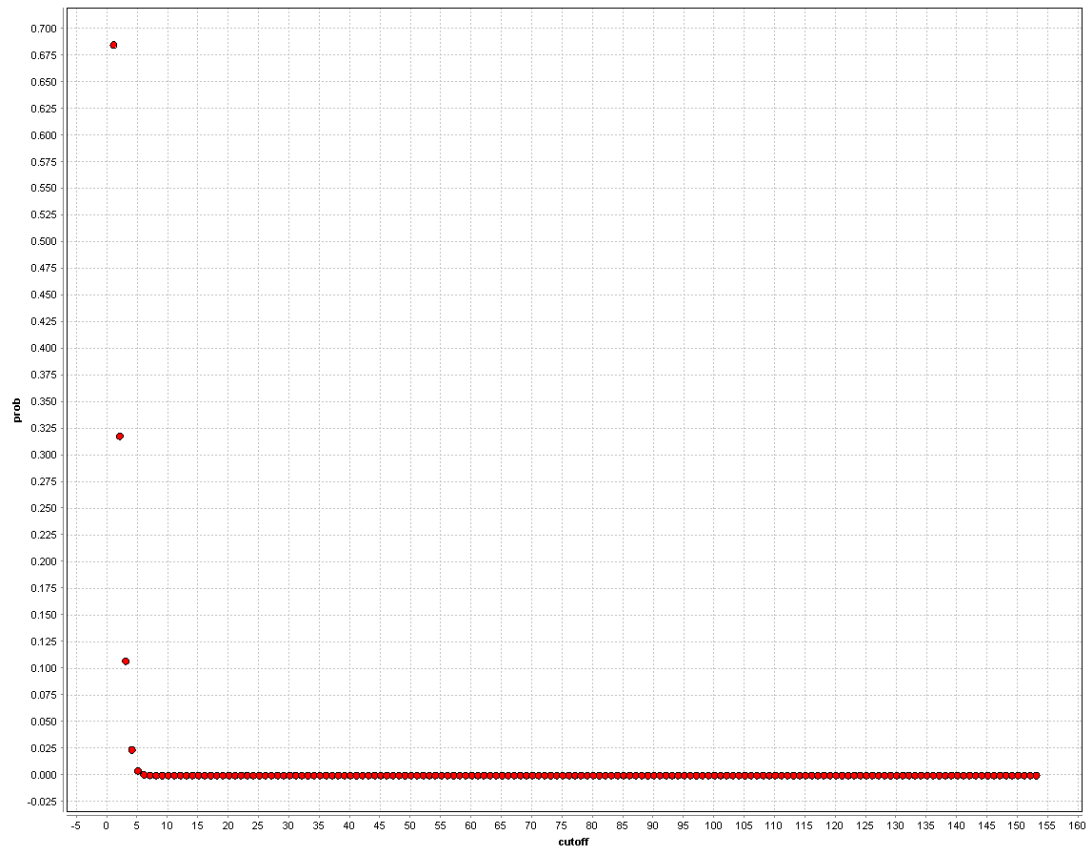

Supplementary Figure 3: Probability of overlapping for each number of clones estimated for set3 of pooled clone data of NA12878 with 153 clones per pool.

Supplementary Table 4: Exact values of of overlapping probabilities estimated for set3 of pooled clone data of NA12878 with 153 clones per pool.

| cutoff | prob    |
|--------|---------|
| 1      | 68.498% |
| 2      | 31.823% |
| 3      | 10.719% |
| 4      | 2.403%  |
| 5      | 0.436%  |
| 6      | 0.072%  |
| 7      | 0.013%  |
| 8      | 0.001%  |
| 9-153  | 0.00%   |

## 1.4 Clone reconstruction rate

In order to evaluate the number of clones correctly reconstructed, we simulated random clones on chromosome 1 with normally distributed sizes of ( $\mu=150$  Kbp ,  $\sigma=40$  Kbp) in 288 pools and generated random read pairs of size ( $\mu=600$  bp ,  $\sigma=60$  bp) with **wgsim**<sup>2</sup> at 3X, 5X, and 10X coverage and mapped them using BWA-MEM [1] and mrFAST [2] aligners. The number of clones that could be inferred correctly with  $\geq 90\%$  reciprocal intersection is given in the Supplementary Table 5. The parameters for the clone reconstruction were obtained by applying a grid optimization which is explained in section 1.5. The 10X, 15X and 20X coverage of mrFAST were not completed because of time restraints. As it can be observed VALOR relies on sufficient physical coverage (i.e. clones per pool) rather than sequencing coverage and can perform precisely in low sequence coverage.

Supplementary Table 5: Number of simulated clones correctly reconstructed by VALOR with at least 90% reciprocal intersection

|                                     | P     | M     | P/M    | percentage |
|-------------------------------------|-------|-------|--------|------------|
| Total Clones                        | 5,079 | 5,001 | 10,080 | 100.00%    |
| Inferred by BWA at 3X read depth    | 4,480 | 4,313 | 8,793  | 87.23%     |
| Inferred by BWA at 5X read depth    | 4,478 | 4,309 | 8,787  | 87.17%     |
| Inferred by BWA at 10X read depth   | 4,478 | 4,310 | 8,788  | 87.18%     |
| Inferred by BWA at 15X read depth   | 4,477 | 4,311 | 8,788  | 87.18%     |
| Inferred by BWA at 20X read depth   | 4,477 | 4,307 | 8,784  | 87.14%     |
| Inferred by mrFAST at 3X read depth | 4,448 | 4,255 | 8,703  | 86.34%     |
| Inferred by mrFAST at 5X read depth | 4,452 | 4,264 | 8,716  | 86.47%     |

P and M are the the paternal and maternal DNA, respectively.

## 1.5 Parameter optimization of clone reconstruction

To reconstruct the clones from the normally mapping paired-end reads of each pool, we first look for windows of a minimum size which is covered by paired-end fragments by a pre-defined coverage rate. These well-covered windows are called clone seeds and are further extended to any existing fragment to the left or right at a given distance. In order to evaluate the best parameters for the minimum clone seed size, minimum coverage, and extension distance we applied a grid optimization on simulated data. Random clones on chromosome 1 with normally distributed sizes of ( $\mu=150$  Kbp ,  $\sigma=40$  Kbp) in 288 pools at 3X physical coverage were simulated and then fragmented with **wgsim** at 3X, 5X, 10X, 15X, and 20X coverage with size ( $\mu=600$  bp,  $\sigma=60$  bp). The parameter grid used is given in the Supplementary Table 6. Due to duplicated regions and gaps and overlapping clones, not all clones can be precisely retrieved. It is worth mentioning that the reconstruction rate did not improve by increasing the coverage to 15X and 20X. Also, contrary to our expectation, mrFAST aligner could not perform as precisely as the BWA-MEM aligner. The optimum set of parameters were minimum clone seed length of 6.5 Kbp, minimum coverage of 50%, and extension distance of 1500 bp. However in the case of real data where split clones occur, the window size should be set to the maximum fragment size such to not miss any split clone smaller than the window size.

Supplementary Table 6: Grid for parameter optimization for clone reconstruction.

| parameter                      | min   | max     | step size                            | number of steps |
|--------------------------------|-------|---------|--------------------------------------|-----------------|
| <b>min seed length</b>         | 3,000 | 146,000 | 500 up to 10,000<br>1,000 afterwards | 160             |
| <b>min coverage</b>            | 0.5   | 1.0     | 0.1                                  | 5               |
| <b>read extension distance</b> | 1,000 | 10,000  | 1,000                                | 10              |
|                                |       |         | <b>total</b>                         | 8,000           |

## 1.6 Parameter optimization of the maximal quasi-clique

In order to find the optimum parameters for the maximal quasi-clique approximation algorithm proposed in [3], 100 random graphs each including 4 highly connected quasi-cliques were produced and on each, a grid optimization was applied. The graphs are not randomly expected cases but rather worse case scenarios that might occur and more similar to what we have observed in the real data set; meaning the neighboring nodes are connected with a higher probability than non adjacent nodes, there might exist many connections between the hidden quasi-cliques, and many edges within each quasi-clique might be missing. The algorithm used to optimize the parameters for the maximal quasi-clique approximation is given in Algorithm 1.

<sup>2</sup><https://github.com/lh3/wgsim>

---

**Algorithm 1** Quasi Clique Parameter Optimization

---

```
1: procedure MYPROCEDURE
2:   for case  $\leftarrow 1$  to 99
3:      $G \leftarrow$  a new graph
4:      $Sets[1..5] \leftarrow$  make 4 sets of nodes each of random size  $[4 \times 2^{\lfloor \frac{case}{10} \rfloor}, 6 \times 2^{\lfloor \frac{case}{10} \rfloor}]$ 
5:      $n \leftarrow |set1| + |set2| + |set3| + |set4|$ 
6:     place all the nodes in  $G$  in order of the set and label them from 1 to  $n$ 
7:     add another random  $[4 \times 2^{\lfloor \frac{case}{10} \rfloor}, 6 \times 2^{\lfloor \frac{case}{10} \rfloor}]$  nodes in between the nodes of  $G$ 
8:      $\forall i, j \in G.nodes$  add  $edge(i, j)$ 
       with a probability of  $\begin{cases} 80\%, & \text{if } (node_i \& node_j \in \text{the same set}) \\ distance^{-2} \times 60\%, & \text{otherwise} \end{cases}$ 
       where distance is the difference of the order of the two nodes in the graph
9:     for each  $tabu \in \{1, 2, \dots, case/2\}$  &  $lambda \in \{0.1, 0.2, \dots, 0.9\}$  &  $gamma \in \{0.1, 0.2, \dots, 0.9\}$ 
        $Solution \leftarrow MaximalQuasiClique(G, tabu, lambda, gamma)$ 
        $Score[case, n, tabu, lambda, gamma] = ((\text{number of real cliques}) - (\text{number of cliques found in Solution})$ 
          $+ (\text{number of elements in each clique that were found})) / \lfloor \frac{case}{10} \rfloor$ 
10:    find the highest scoring point of (n, tabu, lambda, gamma)
```

\* Note that no penalty is applied if the algorithm returns the set with additional nodes because this will not cause any difference in the final inversion detection.

---

It was observed that  $tabu \leq 5$  results into instability and slow convergence while values  $\gg |nodes|/10$  result in poor performance. Thus, VALOR sets the tabu relative to the size of the nodes of the graph. Also, for small number of nodes ( $< 100$ ) high lambda and gamma performed better, but as the number of nodes increased and the quasi-cliques overlapped more, increasing the lambda and gamma caused the algorithm to return only the largest quasi-clique with the most connected nodes of that clique. For larger graph sizes, lambda and gamma close to 0.5 performed better. Observing that the cliques in the first simulation data (physical coverage 3-4X) have hundred of nodes where lambda and gamma near 0.5 held the highest scores in that range, in the next phase, we ran the algorithm on simulation 1 data set (see section 1.9) on the inferred clones from BWA mapped read pairs with 10X coverage for a grid of  $lambda \in \{0.4, 0.5, 0.6\}$  and  $gamma \in \{0.4, 0.5, 0.6\}$ . As a result the optimum values for lambda and gamma were 0.5 and 0.6, respectively.

## 1.7 The set cover approximation problem

Initially we tried to formulate the split clone clustering problem as a set cover problem, similar to the approach used by Variation Hunter [4]. However in most cases we observe the set cover approximation returns inversion with one breakpoint precisely, while the other breakpoint is far from the exact locus. The problem is due to the nature of inversions where the breakpoints are located on duplications and highly repeated regions. For this reason, the inversion signatures, both split clones and read pairs, will have almost complete cliques for each inversion with many edges between the neighboring cliques. The equivalent for such a situation with a set cover formulation will be neighboring sets sharing the some elements as shown in Equation 9 and Supplementary Figure 4 :

$$\begin{aligned} U &= \{A, B, C, D, E, F, G, H, I, J\} \\ S &= \{\{A, B, C, D, H\}, \{C, D, E, F, H\}, \{F, G, H\}, \{H, I, J\}\} \end{aligned} \tag{9}$$

The set cover performing in any order will fail to recognize the most reliable breakpoint set because its greedy approach just chooses the set with the highest number of *new elements* which might lead to disfavoring other sets as their elements will become *found already*, and as a result, it will get stuck in a local optimum which is most likely the duplications near the breakpoint rather than the actual inversion itself. In contrast, if we choose a maximal quasi-clique approach, it can jump over these in-between-clique-edges and find the actual inversion. The effectiveness of the quasi-clique approach was observed on the second simulated data set (see section 1.10). The problem of set cover approximation can be solved to some extent by applying a semi-randomization technique in compare to ordered set cover approximation, but this will cause the approximation rate to be unpredictable, and therefore, unreliable. The SAVANT [5] visualization in Supplementary Figure 5 shows a real example of such in-between-clique-edges. Notice the humps made by the paired-end reads mapping around the HsInv1049 inversion of the NA12878 individual with breakpoint 1 at chr15:30,370,112–30,910,305 and breakpoint 2 at chr15:32,445,408–32,899,708. The quasi-cliques around the original inversion clique can be seen clearly in this picture.



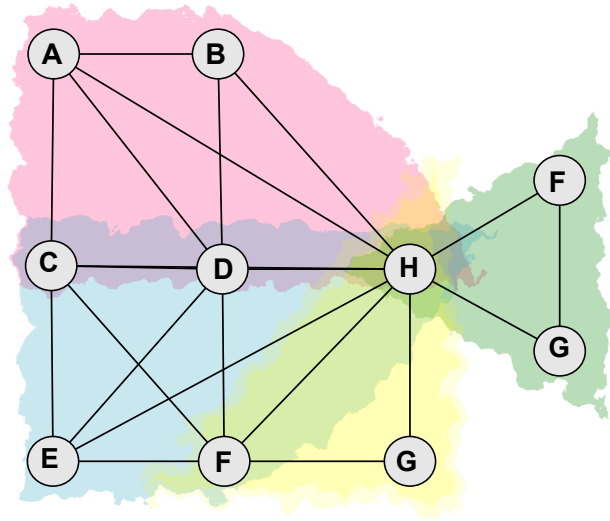

Supplementary Figure 4: Graph representation for the example given in (9). Each colored area represents a clique (equivalent to a set in the set cover formulation).

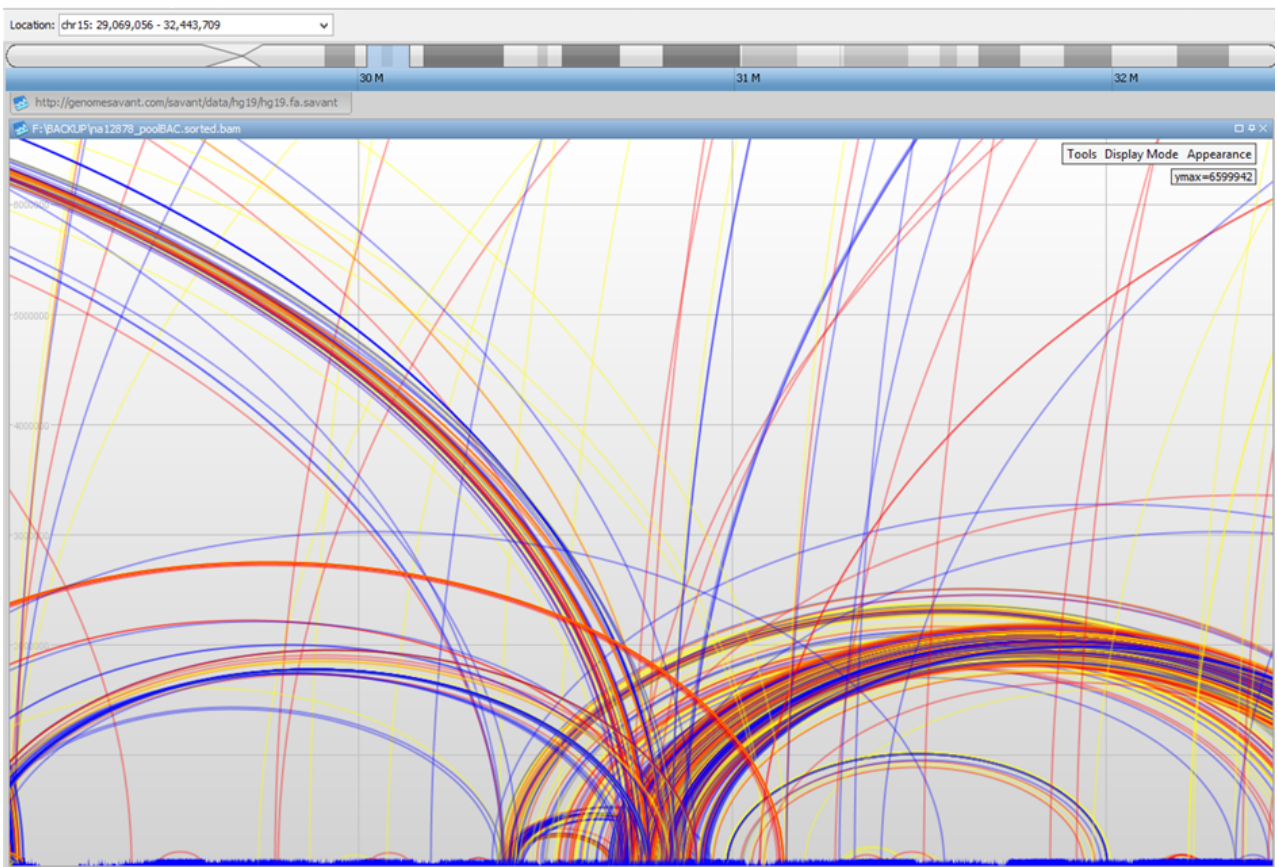

Supplementary Figure 5: Mapped paired-end reads around the HsInv1049 inversion of the NA12878 individual illustrated by SAVANT. Red arcs display the discordant length mapping paired-end reads, dark blue represent the one read inverted, yellow arcs represent the everted paired-end reads and the lighter blue forward, reverse, or concordant length paired-end reads. Reads were mapped by BWA in this example.

## 1.8 Other structural variation split clone signatures

### A) Inversion

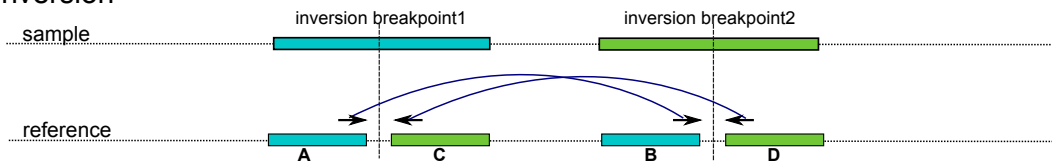

### B) Deletion

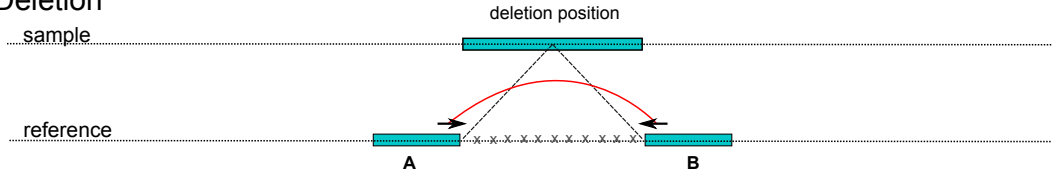

### C) Insertion

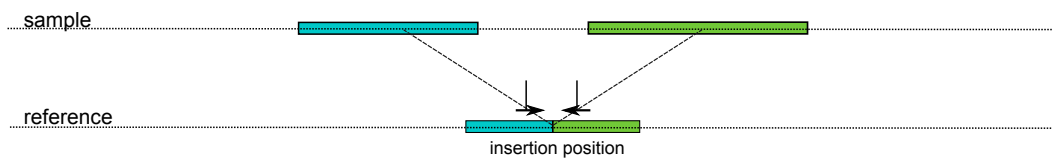

### D) Duplication

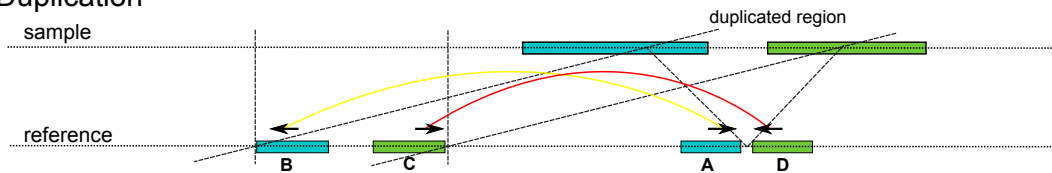

### E) Inverted duplication

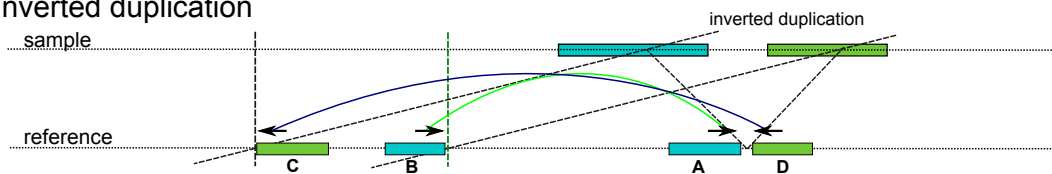

#### Arc colors

|                   |        |
|-------------------|--------|
| Forward Strand    | Blue   |
| Reverse Strand    | Red    |
| Concordant Length | Blue   |
| Discordant Length | Red    |
| One Read Inverted | Blue   |
| Everted Pair      | Yellow |

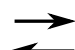

Read pair mapping to the forward strand

Read pair mapping to the reverse strand

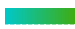

A random clone on the genome

A - B

C - D

Split clones:  
A and B come from the same pool  
and C and D come from same pool different from A and B

Supplementary Figure 6: Split clone and paired-read signature for different types of structural variations. Clones on the donor genome (sample) will break into a split clone on SV breakpoints and create specific read signatures as depicted.

## 1.9 Correctness of VALOR on simulated data

In order to evaluate the correctness of VALOR, 8 inversions of random size in range [500 Kbp , 10 Mbp] were implanted onto the human reference genome (GRCh37) chromosome 1 at random positions. The list of the inversions is given in Supplementary Table 7. Random clones with normal size distribution of ( $\mu=150$  Kbp and  $\sigma=4$  Kbp) were simulated in 288 pools at  $\sim 3X$  physical coverage and read pairs with normally distributed size of ( $\mu=600$  bp and  $\sigma=60$  bp) were generated by wgsim at 3X, 5X, and 10X coverage. The paired-end reads were mapped by BWA and mrFAST aligner and then, using VALOR, the inversions were called. Tables below show the results of each experiment.

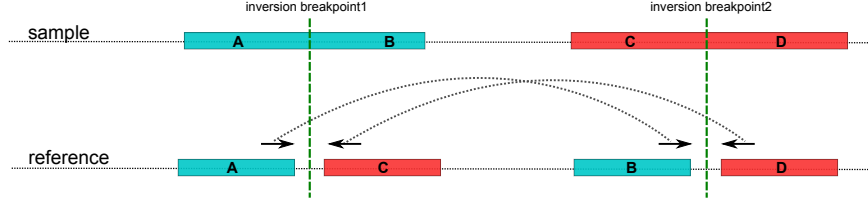

Supplementary Figure 7: Paired split clone signature of an inversion. Split clone AB from one pool and split clone CD from another pool will map accordingly to the reference genome with ++ reads supporting the AB split clone and -- reads supporting the CD split clone.

Supplementary Table 7: Inversions implanted on chromosome 1 for the first and second simulation experiments

| ID   | Start (bp)  | End (bp)    | Length (bp) | Genotype | SC <sub>1L</sub> | SC <sub>1R</sub> | Detectable <sub>1</sub> | SC <sub>2L</sub> | SC <sub>2R</sub> | Detectable <sub>2</sub> |
|------|-------------|-------------|-------------|----------|------------------|------------------|-------------------------|------------------|------------------|-------------------------|
| Inv1 | 4,676,939   | 6,950,520   | 2,273,580   | Het (P)  | 4                | 2                | Y                       | 0                | 3                | N                       |
| Inv2 | 69,598,859  | 72,079,080  | 2,480,220   | Het (M)  | 2                | 3                | Y                       | 10               | 6                | Y                       |
| Inv3 | 76,232,699  | 82,398,900  | 6,166,200   | Hom      | 7                | 6                | Y                       | 5+4              | 5+3              | Y                       |
| Inv4 | 94,844,699  | 98,902,620  | 4,057,920   | Hom      | 8                | 5                | Y                       | 3+4              | 5+2              | Y                       |
| Inv5 | 107,694,119 | 109,006,800 | 1,312,680   | Het (P)  | 1                | 4                | Y                       | 1                | 4                | Y                       |
| Inv6 | 171,527,459 | 176,658,000 | 5,130,540   | Het (M)  | 2                | 7                | Y                       | 1                | 1                | Y                       |
| Inv7 | 185,266,199 | 187,919,700 | 2,653,500   | Hom      | 11               | 5                | Y                       | 2+3              | 3+2              | Y                       |
| Inv8 | 190,600,559 | 198,012,420 | 7,411,860   | Hom      | 6                | 7                | Y                       | 2+4              | 5+4              | Y                       |

SC<sub>1L</sub> and SC<sub>1R</sub> are the number of split clones on the left and right breakpoint of the first simulation, respectively and SC<sub>2L</sub> and SC<sub>2R</sub> are for the second simulation (complex rearrangements). The two split clone numbers for left/right breakpoints in the second simulation are separately shown for maternal and paternal homologs, as the deletions and duplications are simulated as heterozygous. Detectable<sub>1</sub> and Detectable<sub>2</sub> shows if there are sufficient number of split clones spanning the inversion breakpoint in the first and second simulation, respectively. Implanted inversions may be on one of the homologs (genotype=Het), or both (genotype=Hom). P: paternal, M: maternal copy.

Supplementary Table 8: Simulation 1 results at 3X sequence coverage using the ++/-- reads aligned by the BWA-MEM aligner

| chrom | left start  | left end    | right start | right end   | AB | CD | PSC | Clu++ | Clu-- |
|-------|-------------|-------------|-------------|-------------|----|----|-----|-------|-------|
| chr1  | 4,676,834   | 4,676,941   | 6,950,341   | 6,950,523   | 4  | 10 | 9   | 4     | 10    |
| chr1  | 69,598,666  | 69,598,985  | 72,078,771  | 72,079,641  | 11 | 7  | 24  | 11    | 7     |
| chr1  | 76,232,635  | 76,232,701  | 82,398,750  | 82,398,912  | 8  | 13 | 24  | 8     | 13    |
| chr1  | 94,844,639  | 94,844,699  | 98,902,086  | 98,902,652  | 5  | 14 | 27  | 5     | 14    |
| chr1  | 107,694,087 | 107,694,177 | 109,006,650 | 109,006,857 | 1  | 4  | 6   | 1     | 4     |
| chr1  | 171,527,266 | 171,527,459 | 176,657,976 | 176,658,043 | 11 | 9  | 20  | 11    | 9     |
| chr1  | 185,266,111 | 185,266,201 | 187,919,391 | 187,920,258 | 4  | 11 | 21  | 4     | 11    |
| chr1  | 190,600,382 | 190,600,561 | 198,012,231 | 198,012,420 | 10 | 11 | 24  | 10    | 11    |

++ is the read pair support on the AB split clones, -- is the read pair support on the CD split clone, PSC is the number of paired split clones in the cluster, Clu++ and Clu-- are the number of ++ and -- read pairs supporting the cluster.

Supplementary Table 9: Simulation 1 results at 5X sequence coverage using the ++/-- reads aligned by the BWA-MEM aligner

| chrom | left start  | left end    | right start | right end   | ++ | -- | PSC | Clu++ | Clu-- |
|-------|-------------|-------------|-------------|-------------|----|----|-----|-------|-------|
| chr1  | 4,676,711   | 4,676,985   | 6,950,365   | 6,950,538   | 7  | 15 | 9   | 7     | 15    |
| chr1  | 69,598,664  | 69,598,861  | 72,079,046  | 72,079,367  | 23 | 6  | 24  | 23    | 6     |
| chr1  | 76,232,620  | 76,232,697  | 82,398,798  | 82,398,945  | 12 | 17 | 24  | 12    | 17    |
| chr1  | 94,844,629  | 94,844,700  | 98,902,557  | 98,902,623  | 7  | 27 | 30  | 7     | 27    |
| chr1  | 107,693,980 | 107,694,241 | 109,006,505 | 109,006,866 | 5  | 3  | 8   | 5     | 3     |
| chr1  | 171,527,327 | 171,527,459 | 176,657,976 | 176,658,024 | 18 | 13 | 20  | 18    | 13    |
| chr1  | 185,265,970 | 185,266,201 | 187,919,576 | 187,919,703 | 7  | 16 | 21  | 7     | 16    |
| chr1  | 190,600,540 | 190,600,715 | 198,012,146 | 198,012,420 | 34 | 7  | 24  | 34    | 7     |

++ is the read pair support on the AB split clones, -- is the read pair support on the CD split clone, PSC is the number of paired split clones in the cluster, Clu++ and Clu-- are the number of ++ and -- read pairs supporting the cluster.

Supplementary Table 10: Simulation 1 results at 10X sequence coverage using the ++/-- reads aligned by the BWA-MEM aligner

| chrom | left start  | left end    | right start | right end   | ++ | -- | PSC | Clu++ | Clu-- |
|-------|-------------|-------------|-------------|-------------|----|----|-----|-------|-------|
| chr1  | 4,676,780   | 4,676,941   | 6,950,466   | 6,950,521   | 24 | 28 | 9   | 24    | 28    |
| chr1  | 69,598,822  | 69,598,861  | 72,078,996  | 72,079,083  | 50 | 21 | 24  | 50    | 21    |
| chr1  | 76,232,586  | 76,232,701  | 82,398,805  | 82,398,903  | 43 | 50 | 24  | 42    | 50    |
| chr1  | 94,844,576  | 94,844,700  | 98,902,553  | 98,902,623  | 19 | 67 | 30  | 19    | 67    |
| chr1  | 107,694,058 | 107,694,121 | 109,006,701 | 109,006,835 | 16 | 7  | 8   | 16    | 7     |
| chr1  | 171,527,415 | 171,527,459 | 176,657,931 | 176,658,002 | 31 | 32 | 20  | 31    | 32    |
| chr1  | 185,266,045 | 185,266,200 | 187,919,633 | 187,919,702 | 15 | 46 | 21  | 15    | 46    |
| chr1  | 190,600,465 | 190,600,561 | 198,012,259 | 198,012,420 | 53 | 18 | 24  | 53    | 18    |

++ is the read pair support on the AB split clones, -- is the read pair support on the CD split clone, PSC is the number of paired split clones in the cluster, Clu++ and Clu-- are the number of ++ and -- read pairs supporting the cluster.

Supplementary Table 11: Simulation 1 results at 3X sequence coverage using the alternative mappings given in the DIVET file obtained by the mrFAST aligner

| chrom | left start  | left end    | right start | right end   | ++ | -- | PSC | Clu |
|-------|-------------|-------------|-------------|-------------|----|----|-----|-----|
| chr1  | 4,676,835   | 4,677,018   | 6,950,341   | 6,950,592   | 4  | 8  | 9   | 4   |
| chr1  | 69,598,666  | 69,598,985  | 72,078,771  | 72,079,641  | 6  | 3  | 4   | 5   |
| chr1  | 76,231,869  | 76,232,778  | 82,398,750  | 82,398,912  | 1  | 10 | 6   | 10  |
| chr1  | 94,844,535  | 94,844,700  | 98,902,086  | 98,902,653  | 2  | 10 | 2   | 10  |
| chr1  | 107,693,648 | 107,694,177 | 109,006,650 | 109,006,857 | 1  | 6  | 6   |     |
| chr1  | 171,527,266 | 171,527,531 | 176,657,911 | 176,658,039 | 5  | 4  | 5   | 4   |
| chr1  | 185,266,111 | 185,266,215 | 187,919,391 | 187,919,926 | 3  | 5  | 3   | 5   |
| chr1  | 190,600,382 | 190,600,608 | 198,012,231 | 198,013,032 | 5  | 5  | 2   | 5   |

++ is the inversion support on the AB split clones, -- is the inversion support on the CD split clone, PSC is the number of paired split clones in the cluster, Clu is the number of inversions supporting the cluster.

Supplementary Table 12: Simulation 1 results at 5X sequence coverage using the alternative mappings given in the DIVET file obtained by the mrFAST aligner

| chrom | left start  | left end    | right start | right end   | ++ | -- | PSC | Clu |
|-------|-------------|-------------|-------------|-------------|----|----|-----|-----|
| chr1  | 4,676,711   | 4,676,985   | 6,950,365   | 6,950,538   | 4  | 8  | 9   | 4   |
| chr1  | 69,598,664  | 69,598,883  | 72,078,822  | 72,079,367  | 14 | 3  | 14  | 3   |
| chr1  | 76,232,554  | 76,232,694  | 82,398,798  | 82,399,020  | 6  | 13 | 6   | 13  |
| chr1  | 94,844,346  | 94,844,710  | 98,902,404  | 98,902,651  | 5  | 17 | 5   | 17  |
| chr1  | 107,693,980 | 107,694,241 | 109,006,586 | 109,006,866 | 9  | 2  | 9   | 2   |
| chr1  | 171,527,327 | 171,527,502 | 176,657,816 | 176,658,127 | 9  | 5  | 9   | 5   |
| chr1  | 185,265,970 | 185,266,210 | 187,919,576 | 187,919,739 | 4  | 11 | 4   | 11  |
| chr1  | 190,600,257 | 190,600,715 | 198,012,146 | 198,012,435 | 6  | 5  | 6   | 5   |

++ is the inversion support on the AB split clones, -- is the inversion support on the CD split clone, PSC is the number of paired split clones in the cluster, Clu is the number of inversions supporting the cluster.

Supplementary Table 13: Simulation 1 results at 10X sequence coverage using the alternative mappings given in the DIVET file obtained by the mrFAST aligner

| chrom | left start  | left end    | right start | right end   | ++ | -- | PSC | Clu |
|-------|-------------|-------------|-------------|-------------|----|----|-----|-----|
| chr1  | 4,676,780   | 4,676,942   | 6,950,411   | 6,950,537   | 13 | 11 | 9   | 11  |
| chr1  | 69,598,738  | 69,598,858  | 72,078,993  | 72,079,090  | 15 | 13 | 15  | 13  |
| chr1  | 76,232,586  | 76,232,693  | 82,398,805  | 82,398,960  | 16 | 28 | 16  | 28  |
| chr1  | 94,844,576  | 94,844,696  | 98,902,473  | 98,902,620  | 18 | 46 | 16  | 46  |
| chr1  | 107,694,009 | 107,694,135 | 109,006,701 | 109,006,808 | 20 | 3  | 8   | 3   |
| chr1  | 171,527,353 | 171,527,461 | 176,657,868 | 176,658,081 | 17 | 25 | 20  | 25  |
| chr1  | 185,266,045 | 185,266,192 | 187,919,389 | 187,919,743 | 6  | 29 | 6   | 29  |
| chr1  | 190,600,465 | 190,600,557 | 198,012,259 | 198,012,496 | 34 | 16 | 24  | 16  |

++ is the inversion support on the AB split clones, -- is the inversion support on the CD split clone, PSC is the number of paired split clones in the cluster, Clu is the number of inversions supporting the cluster.

## 1.10 Robustness to other structural variations

In the second simulation other types of structural variations (SVs) were implanted near the same inversion breakpoints given in Supplementary Table 7 to observe the sensitivity of VALOR to the presence of the SVs around the breakpoints. The implanted SVs are given in Supplementary Table 14 and 15. Due to random cloning, the first inversion was not discoverable. All methods could retrieve the 7 discoverable inversions with no false positives except for mrFAST at 10X which suffered two false positive calls which shows that increasing the sequencing coverage too high will not always give better results. We have also shown that increasing the sequence coverage will worsen the clone reconstruction rate (see section 1.4).

Supplementary Table 14: Duplications implanted on chromosome 1 for the second simulation

| No. | Target Locus(Mbp) | Genotype (target) | Source Locus (Mbp)  | Genotype (source) | Length (Mbp) | Site | Type     |
|-----|-------------------|-------------------|---------------------|-------------------|--------------|------|----------|
| 1   | 77                | Hom               | 75-77               | Hom               | 2            | Inv3 | Direct   |
| 2   | 81                | Hom               | 83-84               | Hom               | 2            | Inv3 | Direct   |
| 3   | 95                | Het (P)           | 92-94               | Het (M)           | 2            | Inv4 | Direct   |
| 4   | 97                | Hom               | 98-99               | Het (M)           | 1            | Inv4 | Direct   |
| 5   | 109               | Hom               | 106.5-107.5         | Het (M)           | 1            | Inv5 | Direct   |
| 6   | 174               | Het (M)           | 175-177             | Het (M)           | 2            | Inv6 | Direct   |
| 7   | 200               | Hom               | Inv7.start-Inv7.end | Hom               | 3            | -    | Inverted |
| 8   | 221               | Het (M)           | 217.8-219           | Het (M)           | 1.2          | -    | Inverted |
| 9*  | 223               | Het (P)           | 217.8-219           | Het (P)           | 1.2          | -    | Inverted |

Duplications 1-6 were in direct orientation, and 7-9 were inverted. Duplication #7 shares the same breakpoints with Inv7. \*The duplication was inserted twice. Hom and Het are homozygous and heterozygous and P and M stand for paternal and maternal DNA.

Supplementary Table 15: Deletions implanted on chromosome 1 for the second simulation

| No. | Locus (Mbp) | Length (Mbp) | Genotype | Site |
|-----|-------------|--------------|----------|------|
| 1   | 4.5-4.67    | 0.17         | Hom      | Inv1 |
| 2   | 4.68-4.7    | 0.02         | Hom      | Inv1 |
| 3   | 6.5-6.9     | 0.4          | Het (P)  | Inv1 |
| 4   | 7.0-7.6     | 0.6          | Het (P)  | Inv1 |
| 5   | 65-69.5     | 4.5          | Het (M)  | Inv2 |
| 6   | 72-73       | 1            | Het (P)  | Inv2 |

Deletions are simulated as either heterozygous or homozygous (genotype, P: paternal, M: maternal copy for heterozygous simulations). Site: the ID of the closest implanted inversion (see Supplementary Table 7).

Supplementary Table 16: Simulation 2 results for BWA-MEM aligner at 3X sequence coverage

| chrom | left start  | left end    | right start | right end   | ++ | -- | PSC | Clu++ | Clu-- |
|-------|-------------|-------------|-------------|-------------|----|----|-----|-------|-------|
| chr1  | 69,598,700  | 69,598,861  | 72,078,819  | 72,079,086  | 12 | 8  | 30  | 12    | 8     |
| chr1  | 76,232,671  | 76,232,701  | 82,398,281  | 82,398,903  | 33 | 7  | 48  | 33    | 7     |
| chr1  | 94,844,615  | 94,844,700  | 98,902,491  | 98,902,886  | 13 | 18 | 64  | 13    | 18    |
| chr1  | 107,499,795 | 107,568,153 | 108,891,152 | 108,979,319 | 2  | 1  | 1   | 0     | 0     |
| chr1  | 171,527,333 | 171,527,459 | 176,657,966 | 176,658,003 | 5  | 3  | 12  | 5     | 3     |
| chr1  | 185,266,097 | 185,266,226 | 187,919,308 | 187,919,755 | 7  | 8  | 15  | 7     | 8     |
| chr1  | 190,600,405 | 190,600,561 | 198,012,320 | 198,012,772 | 15 | 6  | 50  | 15    | 6     |

++ is the read pair support on the AB split clones, -- is the read pair support on the CD split clone, PSC is the number of paired split clones in the cluster, Clu++ and Clu-- are the number of ++ and -- read pairs supporting the cluster.

Supplementary Table 17: Simulation 2 results for BWA-MEM aligner at 5X sequence coverage

| chrom | left start  | left end    | right start | right end   | ++ | -- | PSC | Clu++ | Clu-- |
|-------|-------------|-------------|-------------|-------------|----|----|-----|-------|-------|
| chr1  | 69,598,710  | 69,598,860  | 72,078,766  | 72,079,083  | 26 | 14 | 30  | 26    | 14    |
| chr1  | 76,232,516  | 76,232,698  | 82,398,843  | 82,398,943  | 48 | 11 | 48  | 48    | 11    |
| chr1  | 94,844,540  | 94,844,700  | 98,902,374  | 98,902,816  | 22 | 40 | 64  | 22    | 40    |
| chr1  | 107,693,988 | 107,694,121 | 109,006,493 | 109,006,998 | 1  | 6  | 2   | 1     | 6     |
| chr1  | 171,527,312 | 171,527,458 | 176,657,887 | 176,658,099 | 9  | 15 | 12  | 9     | 15    |
| chr1  | 185,266,150 | 185,266,201 | 187,919,652 | 187,919,706 | 12 | 10 | 15  | 12    | 10    |
| chr1  | 190,600,428 | 190,600,561 | 198,012,352 | 198,012,420 | 25 | 14 | 50  | 25    | 14    |

++ is the read pair support on the AB split clones, -- is the read pair support on the CD split clone, PSC is the number of paired split clones in the cluster, Clu++ and Clu-- are the number of ++ and -- read pairs supporting the cluster.

Supplementary Table 18: Simulation 2 results for BWA-MEM aligner at 10X sequence coverage

| chrom | left start  | left end    | right start | right end   | ++ | -- | PSC | Clu++ | Clu-- |
|-------|-------------|-------------|-------------|-------------|----|----|-----|-------|-------|
| chr1  | 69,598,788  | 69,598,861  | 72,078,864  | 72,079,083  | 45 | 27 | 30  | 45    | 27    |
| chr1  | 76,232,516  | 76,232,696  | 82,398,875  | 82,398,903  | 67 | 46 | 48  | 67    | 46    |
| chr1  | 94,844,475  | 94,844,700  | 98,902,491  | 98,902,623  | 37 | 79 | 64  | 37    | 79    |
| chr1  | 107,694,061 | 107,694,121 | 109,006,687 | 109,006,803 | 4  | 15 | 2   | 4     | 15    |
| chr1  | 171,527,415 | 171,527,459 | 176,657,801 | 176,658,003 | 23 | 37 | 12  | 23    | 37    |
| chr1  | 185,266,101 | 185,266,201 | 187,919,641 | 187,919,703 | 34 | 18 | 15  | 34    | 18    |
| chr1  | 190,600,270 | 190,600,561 | 198,012,253 | 198,012,420 | 26 | 28 | 50  | 26    | 28    |

++ is the read pair support on the AB split clones, -- is the read pair support on the CD split clone, PSC is the number of paired split clones in the cluster, Clu++ and Clu-- are the number of ++ and -- read pairs supporting the cluster.

Supplementary Table 19: Simulation 2 results for mrFAST aligner at 3X sequence coverage using alternative mappings given in the DIVET file

| chrom | left start  | left end    | right start | right end   | ++ | -- | PSC | Clu |
|-------|-------------|-------------|-------------|-------------|----|----|-----|-----|
| chr1  | 69,598,538  | 69,598,883  | 72,078,971  | 72,079,224  | 4  | 2  | 4   | 2   |
| chr1  | 76,232,548  | 76,232,843  | 82,398,281  | 82,399,081  | 13 | 3  | 13  | 3   |
| chr1  | 94,844,416  | 94,844,701  | 98,902,491  | 98,902,768  | 7  | 10 | 6   | 10  |
| chr1  | 107,693,958 | 107,694,370 | 109,006,676 | 109,006,917 | 1  | 4  | 1   | 4   |
| chr1  | 171,527,333 | 171,527,501 | 176,657,804 | 176,658,190 | 4  | 3  | 4   | 3   |
| chr1  | 185,266,097 | 185,266,226 | 187,919,308 | 187,919,755 | 4  | 4  | 4   | 4   |
| chr1  | 190,600,405 | 190,600,565 | 198,012,320 | 198,012,473 | 7  | 4  | 7   | 4   |

++ is the inversion support on the AB split clones, -- is the inversion support on the CD split clone, PSC is the number of paired split clones in the cluster, Clu is the number of inversions supporting the cluster.

Supplementary Table 20: Simulation 2 results for mrFAST aligner at 5X sequence coverage using alternative mappings given in the DIVET file

| chrom | left start  | left end    | right start | right end   | ++ | -- | PSC | Clu |
|-------|-------------|-------------|-------------|-------------|----|----|-----|-----|
| chr1  | 69,598,710  | 69,598,861  | 72,078,767  | 72,079,099  | 10 | 10 | 10  | 10  |
| chr1  | 76,232,516  | 76,232,698  | 82,398,623  | 82,398,943  | 22 | 6  | 22  | 6   |
| chr1  | 94,844,540  | 94,844,733  | 98,902,374  | 98,902,620  | 12 | 28 | 12  | 28  |
| chr1  | 107,693,989 | 107,694,214 | 109,006,493 | 109,006,998 | 1  | 6  | 1   | 6   |
| chr1  | 171,527,312 | 171,527,459 | 176,657,887 | 176,658,100 | 7  | 7  | 7   | 7   |
| chr1  | 185,266,067 | 185,266,195 | 187,919,478 | 187,919,793 | 4  | 5  | 4   | 5   |
| chr1  | 190,600,428 | 190,600,557 | 198,012,265 | 198,012,598 | 9  | 7  | 9   | 7   |

++ is the inversion support on the AB split clones, -- is the inversion support on the CD split clone, PSC is the number of paired split clones in the cluster, Clu is the number of inversions supporting the cluster.

Supplementary Table 21: Simulation 2 results for mrFAST aligner and 10X coverage using alternative mappings given in the DIVET file.

| chrom | left start  | left end    | right start | right end   | ++ | -- | PSC | Clu |
|-------|-------------|-------------|-------------|-------------|----|----|-----|-----|
| chr1  | 69,598,738  | 69,598,865  | 72,078,911  | 72,079,129  | 13 | 17 | 12  | 17  |
| chr1  | 76,232,589  | 76,232,695  | 82,398,757  | 82,398,924  | 12 | 21 | 12  | 21  |
| chr1  | 94,844,589  | 94,844,705  | 98,902,486  | 98,902,657  | 14 | 14 | 14  | 14  |
| chr1  | 107,694,017 | 107,694,118 | 109,006,506 | 109,006,846 | 7  | 1  | 2   | 1   |
| chr1  | 145333689   | 145342656   | 148329447   | 148321572   | 2  | 1  | 9   | 0   |
| chr1  | 145333653   | 145342742   | 148015682   | 148011520   | 2  | 7  | 1   | 1   |
| chr1  | 171,527,320 | 171,527,463 | 176,657,906 | 176,658,084 | 9  | 7  | 10  | 7   |
| chr1  | 185,266,027 | 185,266,199 | 187,919,523 | 187,919,764 | 6  | 26 | 49  | 5   |
| chr1  | 190,600,446 | 190,600,557 | 198,012,281 | 198,012,420 | 26 | 7  | 14  | 7   |

++ is the inversion support on the AB split clones, -- is the inversion support on the CD split clone, PSC is the number of paired split clones in the cluster, Clu is the number of inversions supporting the cluster.

### 1.11 Comparison to other tools

In order to compare our algorithm with other tools available in the literature we ran LUMPY [6], INVY [7] (DELLY2), and VariationHunter [4] on paired-end reads of chromosome 1 with the implanted inversions given in Supplementary Table 7 and the extra SVs (simulation 2 data set) at 3X, 5X, and 10X sequence coverage. LUMPY and INVY failed to find any inversions. VariationHunter could find only one inversion. The deletions it found are all incorrect.

Supplementary Table 22: Results from Variation Hunter on the simulation 2 data. At each coverage the same result was obtained.

|                                                                                                                                                                                                                                        |
|----------------------------------------------------------------------------------------------------------------------------------------------------------------------------------------------------------------------------------------|
| Chr:chr1 Start Outer:4,679,679 Start Inner:4,679,924 End Inner:4,700,045 End Outer:4,700,354<br>SVtype:D sup:3 Sum Weight:0 AvgEditDits:6.333333<br>LibSup:3 LibHurScore:3 AvgEditDistInd:6.333333 minDelLen:19,531 maxDelLen:20,331   |
| Chr:chr1 Start Outer:4,727,092 Start Inner:4,727,354 End Inner:5,127,561 End Outer:5,127,787<br>SVtype:D sup:6 Sum Weight:0 AvgEditDits:2.666667<br>LibSup:6 LibHurScore:6 AvgEditDistInd:2.666667 minDelLen:399,504 maxDelLen:400,304 |
| Chr:chr1 Start Outer:6,927,112 Start Inner:6,927,358 End Inner:6,947,467 End Outer:6,947,767<br>SVtype:D sup:4 Sum Weight:0 AvgEditDits:4.500000<br>LibSup:4 LibHurScore:4 AvgEditDistInd:4.5 minDelLen:19,555 maxDelLen:20355         |
| Chr:chr1 Start Outer:107,693,862 Start Inner:107,694,464 End Inner:109,006,483 End Outer:109,006,950<br>SVtype:V sup:5 Sum Weight:0 AvgEditDits:2.400000<br>LibSup:5 LibHurScore:5 AvgEditDistInd:2.4                                  |

### 1.12 Robustness to segmental duplications

In order to show the robustness of the VALOR algorithm to segmental duplications (SDs), in another simulation, 4 inversions with breakpoints spanning on SDs were placed on chromosome 22 of the human genome (GRCh37). The implanted inversions are given in the Supplementary Table 23.

Supplementary Table 23: Inversions implanted on chromosome 22 with breakpoints placed on structural duplications

| chromosome | start locus | end locus  | heterozygous or homozygous |
|------------|-------------|------------|----------------------------|
| chr22      | 18,999,999  | 20,145,000 | heterozygous (paternal)    |
| chr22      | 22,606,699  | 29,075,000 | homozygous                 |
| chr22      | 33,999,999  | 36,524,000 | homozygous                 |
| chr22      | 42,105,089  | 44,963,000 | heterozygous (maternal)    |

Then random BAC ( $\mu=150$  Kbp,  $\sigma=40$  Kbp, cutoff=100 Kbp, clones per pool = 5) and random fosmids ( $\mu=40$  Kbp,  $\sigma=10$  Kbp, cutoff=30 Kbp, clones per pool=16) clones were simulated in 288 pools ( $\sim 4X$  physical coverage) and fragmented by wgsim with 3X, 5X and 10X coverage. Average fragment size was 600 bp with standard deviation of 60 bp. The paired-end reads were mapped with the BWA-MEM aligner. The results are given in the following tables.

Supplementary Table 24: Simulation 3 results for BAC clones mapped with the BWA-MEM aligner at 3X sequence coverage

| chrom | left start | left end   | right start | right end  | ++ | -- | PSC | Clu ++ | Clu -- |
|-------|------------|------------|-------------|------------|----|----|-----|--------|--------|
| chr22 | 18,999,825 | 18,999,998 | 20,145,001  | 20,145,358 | 3  | 6  | 9   | 5      | 6      |
| chr22 | 22,606,790 | 22,607,089 | 29074917    | 29,075,100 | 15 | 6  | 22  | 20     | 6      |
| chr22 | 33,999,534 | 34,000,000 | 36,523,854  | 36,524,146 | 1  | 10 | 20  | 13     | 10     |
| chr22 | 42,105,031 | 42,105,090 | 44,962,358  | 44,963,003 | 7  | 4  | 9   | 7      | 4      |

++ is the inversion support on the AB split clones, -- is the inversion support on the CD split clone, PSC is the number of paired split clones in the cluster, Clu++ and Clu-- are the number of inversions supporting the cluster.

Supplementary Table 25: Simulation 3 results for BAC clones mapped with the BWA-MEM aligner at 5X sequence coverage

| chrom | left start | left end   | right start | right end  | ++ | -- | PSC | Clu ++ | Clu -- |
|-------|------------|------------|-------------|------------|----|----|-----|--------|--------|
| chr22 | 18,999,747 | 19,000,000 | 20144833    | 20,145,367 | 8  | 4  | 9   | 10     | 4      |
| chr22 | 22,606,888 | 22,607,068 | 29074930    | 29,075,002 | 23 | 12 | 22  | 23     | 12     |
| chr22 | 33,999,937 | 34,000,000 | 36,523,984  | 36,524,017 | 15 | 19 | 20  | 15     | 19     |
| chr22 | 42,104,773 | 42,105,090 | 44,963,001  | 44,963,112 | 7  | 7  | 9   | 10     | 4      |

++ is the inversion support on the AB split clones, -- is the inversion support on the CD split clone, PSC is the number of paired split clones in the cluster, Clu++ and Clu-- are the number of inversions supporting the cluster.

Supplementary Table 26: Simulation 3 results for BAC clones mapped with the BWA-MEM aligner at 10X sequence coverage

| chrom | left start | left end   | right start | right end  | ++ | -- | PSC | Clu ++ | Clu -- |
|-------|------------|------------|-------------|------------|----|----|-----|--------|--------|
| chr22 | 19,000,000 | 19,000,000 | 20,145,002  | 20,145,002 | 15 | 8  | 9   | 15     | 8      |
| chr22 | 22,606,979 | 22,607,000 | 29,075,003  | 29,075,001 | 43 | 17 | 22  | 43     | 17     |
| chr22 | 33,999,971 | 34,000,028 | 36,523,951  | 36,524,002 | 30 | 26 | 20  | 30     | 26     |
| chr22 | 42,105,090 | 42,105,140 | 44,963,001  | 44,963,002 | 24 | 17 | 9   | 15     | 8      |

++ is the inversion support on the AB split clones, -- is the inversion support on the CD split clone, PSC is the number of paired split clones in the cluster, Clu++ and Clu-- are the number of inversions supporting the cluster.

Supplementary Table 27: Simulation 3 results for FOSMID clones mapped with the BWA-MEM aligner at 3X sequence coverage

| chrom | left start | left end   | right start | right end  | ++ | -- | PSC | Clu ++ | Clu -- |
|-------|------------|------------|-------------|------------|----|----|-----|--------|--------|
| chr22 | 18,999,962 | 19,000,004 | 20144782    | 20,145,002 | 6  | 3  | 6   | 6      | 3      |
| chr22 | 22,606,369 | 22,607,000 | 29074592    | 29,075,584 | 1  | 11 | 20  | 6      | 11     |
| chr22 | 33,999,762 | 34,000,000 | 36,523,799  | 36,524,002 | 8  | 7  | 12  | 10     | 7      |
| chr22 | 42,105,006 | 42,105,246 | 44,962,974  | 44,963,094 | 2  | 6  | 1   | 2      | 6      |

++ is the inversion support on the AB split clones, -- is the inversion support on the CD split clone, PSC is the number of paired split clones in the cluster, Clu++ and Clu-- are the number of inversions supporting the cluster.

Supplementary Table 28: Simulation 3 results for FOSMID clones mapped with the BWA-MEM aligner at 5X sequence coverage

| chrom | left start | left end   | right start | right end  | ++ | -- | PSC | Clu ++ | Clu -- |
|-------|------------|------------|-------------|------------|----|----|-----|--------|--------|
| chr22 | 18,999,775 | 19,000,000 | 20,145,001  | 20,145,002 | 6  | 6  | 6   | 6      | 6      |
| chr22 | 22,607,000 | 22,607,000 | 29,075,003  | 29,075,093 | 17 | 15 | 15  | 17     | 15     |
| chr22 | 33,999,946 | 34,000,000 | 36,523,649  | 36,524,024 | 15 | 18 | 20  | 15     | 18     |
| chr22 | 42,105,090 | 42,105,308 | 44,963,001  | 44,963,004 | 3  | 9  | 2   | 3      | 11     |

++ is the inversion support on the AB split clones, -- is the inversion support on the CD split clone, PSC is the number of paired split clones in the cluster, Clu++ and Clu-- are the number of inversions supporting the cluster.

Supplementary Table 29: Simulation 3 results for FOSMID clones mapped with the BWA-MEM aligner at 10X sequence coverage

| chrom | left start | left end   | right start | right end  | ++ | -- | PSC | Clu ++ | Clu -- |
|-------|------------|------------|-------------|------------|----|----|-----|--------|--------|
| chr22 | 18,999,910 | 19,000,000 | 20,145,001  | 20,145,002 | 15 | 19 | 6   | 15     | 19     |
| chr22 | 22,607,000 | 22,606,998 | 29,075,003  | 29,075,004 | 38 | 21 | 20  | 38     | 21     |
| chr22 | 33,999,954 | 34,000,000 | 36,524,001  | 36,524,002 | 23 | 22 | 20  | 23     | 22     |
| chr22 | 42,105,009 | 42,105,090 | 44,962,824  | 44,963,002 | 13 | 19 | 2   | 13     | 19     |

++ is the inversion support on the AB split clones, -- is the inversion support on the CD split clone, PSC is the number of paired split clones in the cluster, Clu++ and Clu-- are the number of inversions supporting the cluster.



1.13 VarSim simulation 1: testing prediction performance vs. inversion size.

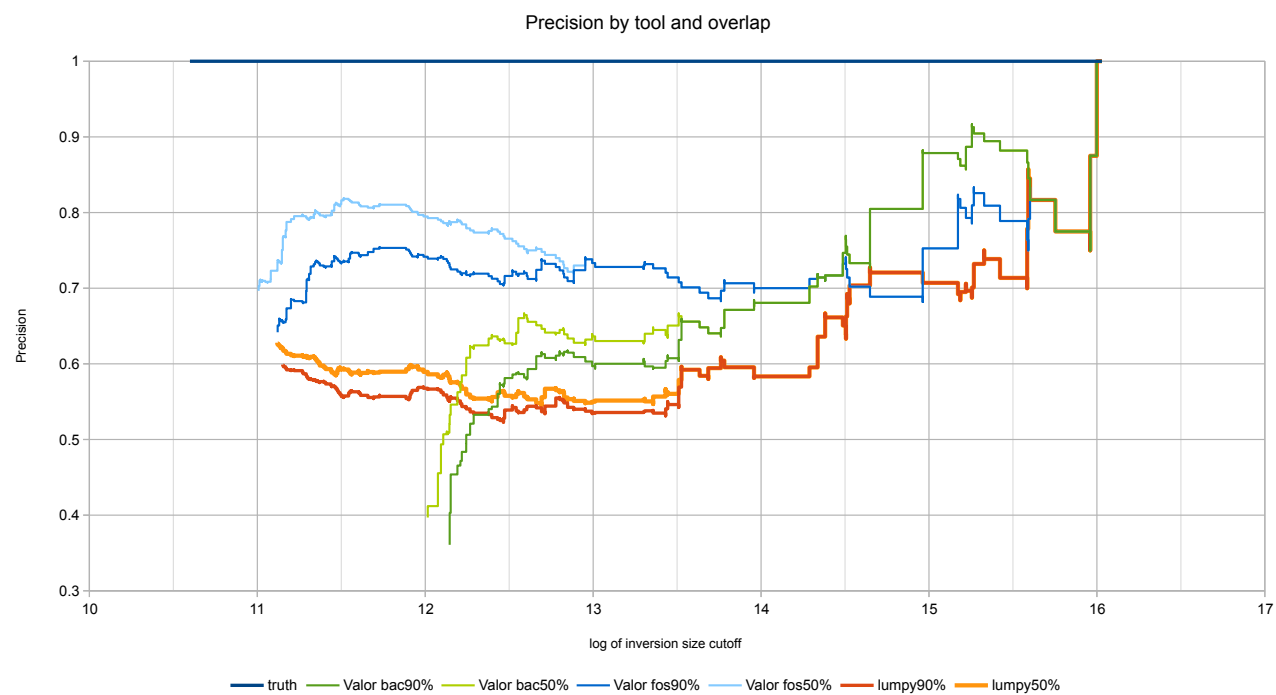

Supplementary Figure 8: Performance of VALOR increases for larger inversions.

### 1.14 VarSim simulation 2: testing different parameters for WGS-based tools.

We performed a second simulation using VarSim to investigate the effect of different parameters on WGS tools and compare against VALOR. We used VarSim with default parameters and inserted a total 616 inversions to the GRCh37 reference genome. 270 inversions had size larger than 40Kbp and 160 had size larger than 80Kbp.

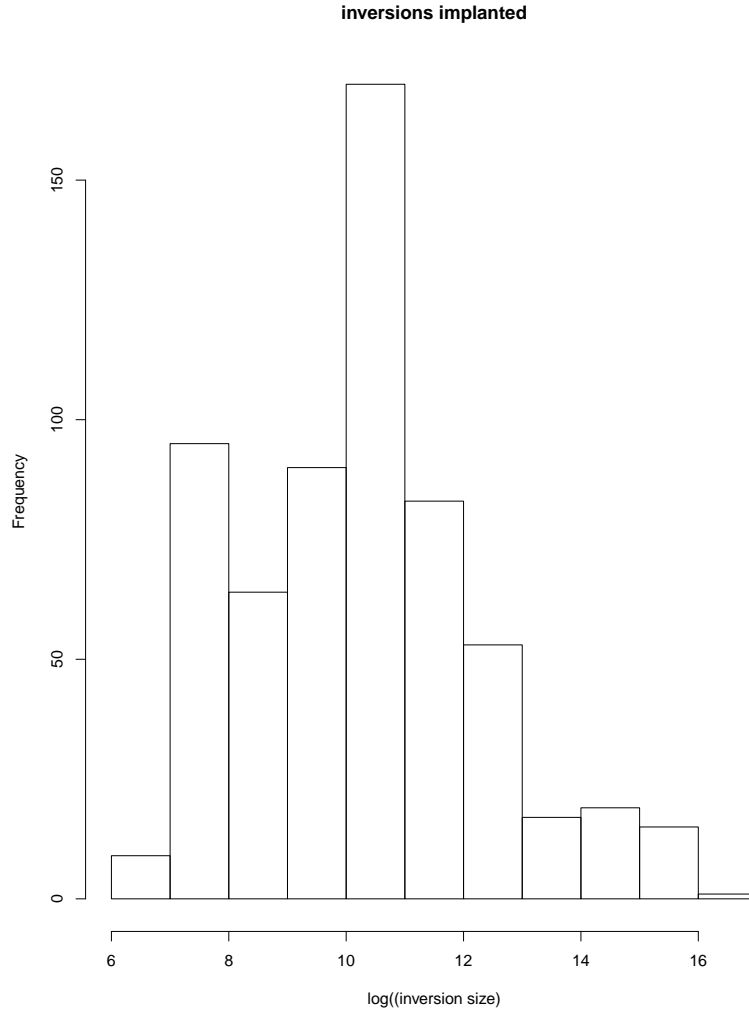

Supplementary Figure 9: Histogram of log of inversion sizes implanted on the GRCh37 male genome with VarSim

For the WGS tools, DELLY2 and LUMPY the genome sequence was simulated at 60X coverage using ART Illumina paired end read simulator with default parameters. We used DELLY2 and LUMPY with the default parameters. We did not test GASVPro due to its poor performance in the previous simulation as presented in the main article.

For VALOR the simulated genome was uniformly sampled using simulated fosmid clones ( $\mu = 40Kbp, \sigma = 10Kbp$ ) at 5X coverage into 300 pools. The reads for the pools were simulated again using ART at 10X coverage. We employed VALOR by setting parameters min and max inversion size to 40Kbp and 10Mbp. 24 inversion breakpoints were by chance not covered by any clone thus remained undetectable by VALOR.

The sensitivity and precision was calculated at each cut off (inversion size > cut off) to illustrate how the performance of valor increases for detecting larger inversions. We calculated the overlap for inversions using the intersectBed tool in the BEDtools 2.26 suite. Supplementary Figures 10, 11, 12, and 13 show the performance of each tool for inversion greater than some cutoff at 50% and 90% reciprocal overlap. As the figures demonstrate, LUMPY is very sensitive to read length (compared to the 150bp long reads in the main article) and DELLY2 has better performance in smaller inversions. The inversions marked as precise by DELLY2 have are shown separately. At large inversions VALOR outperforms both tools. All the files output by the tools and the variations implanted are in Additional File 2.

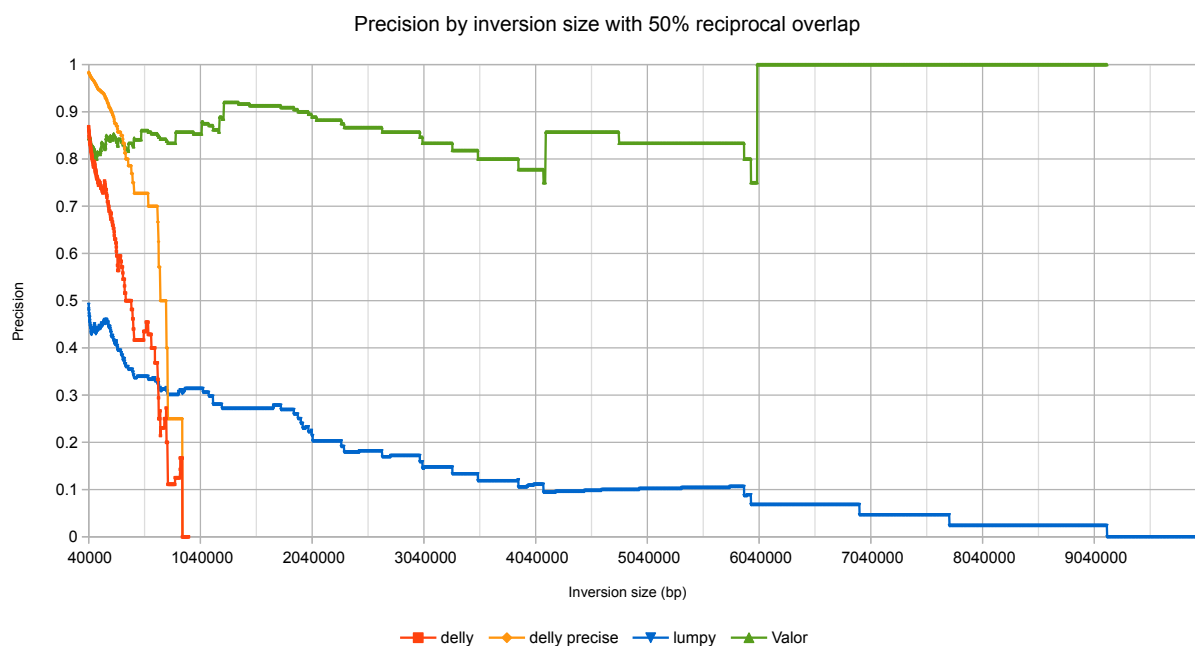

Supplementary Figure 10: Precision of WGS tools DELLY2 and LUMPY compared to VALOR on VarSim simulated data at 50% reciprocal intersection with BEDtools.

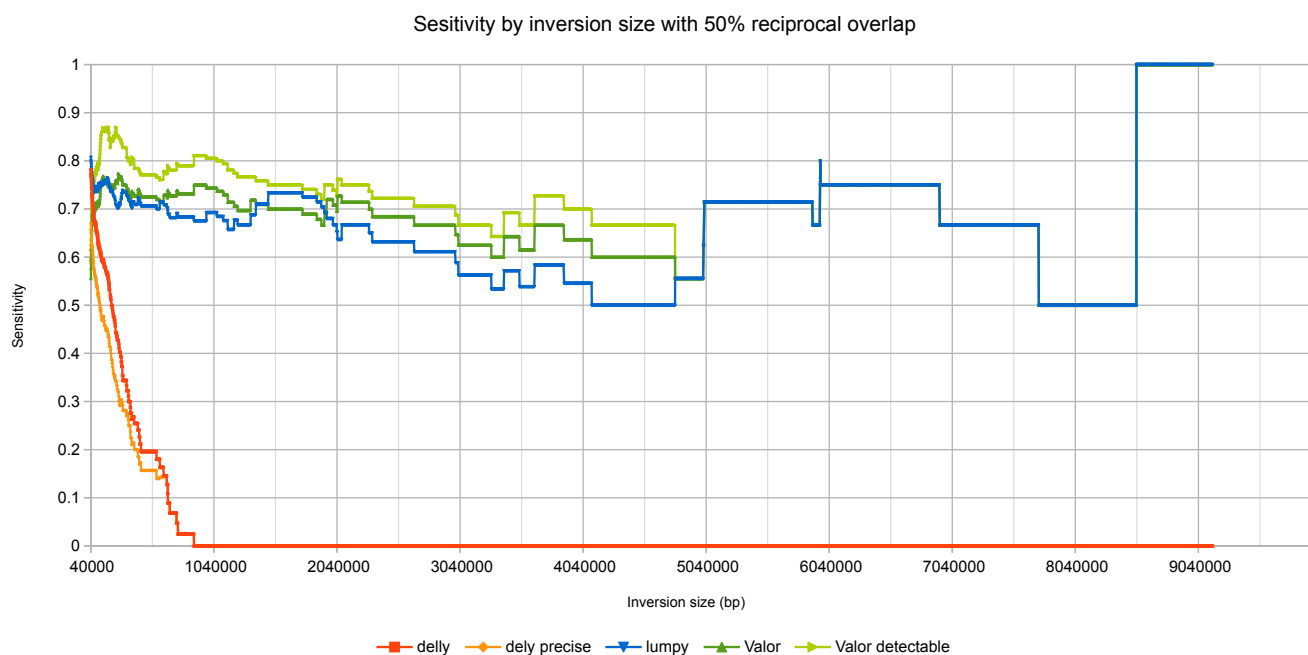

Supplementary Figure 11: Sensitivity of WGS tools DELLY2 and LUMPY compared to VALOR on VarSim simulated data at 50% reciprocal intersection with BEDtools.

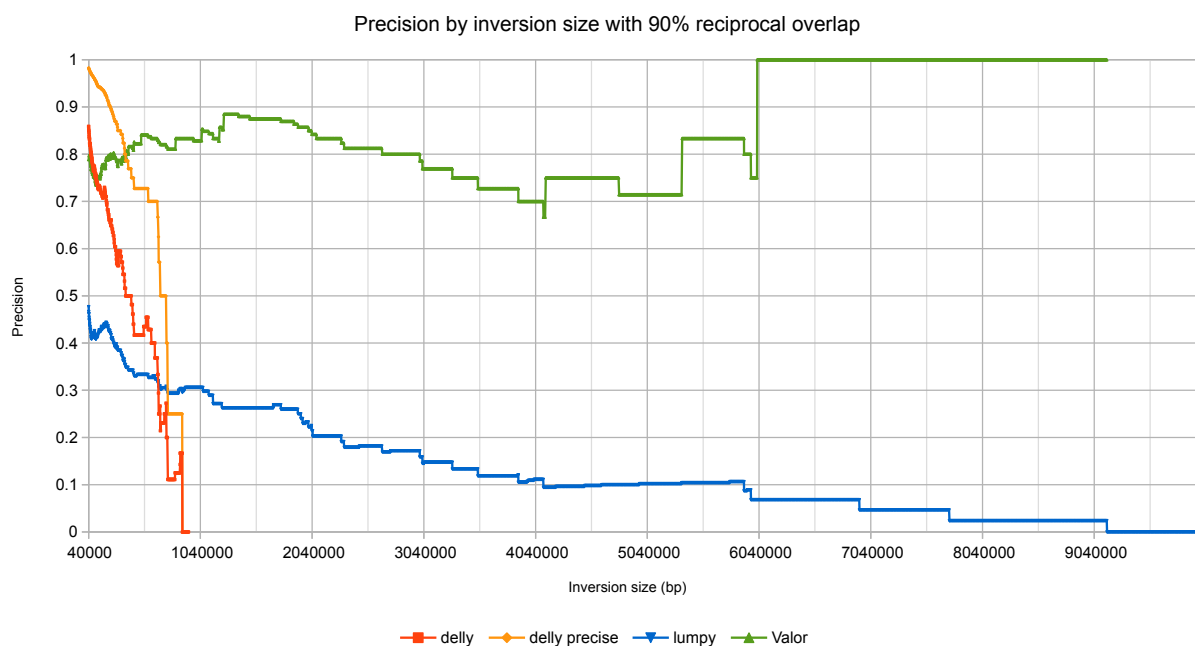

Supplementary Figure 12: Performance of WGS tools DELLY2 and LUMPY compared to VALOR on VarSim simulated data at 90% reciprocal intersection with BEDtools.

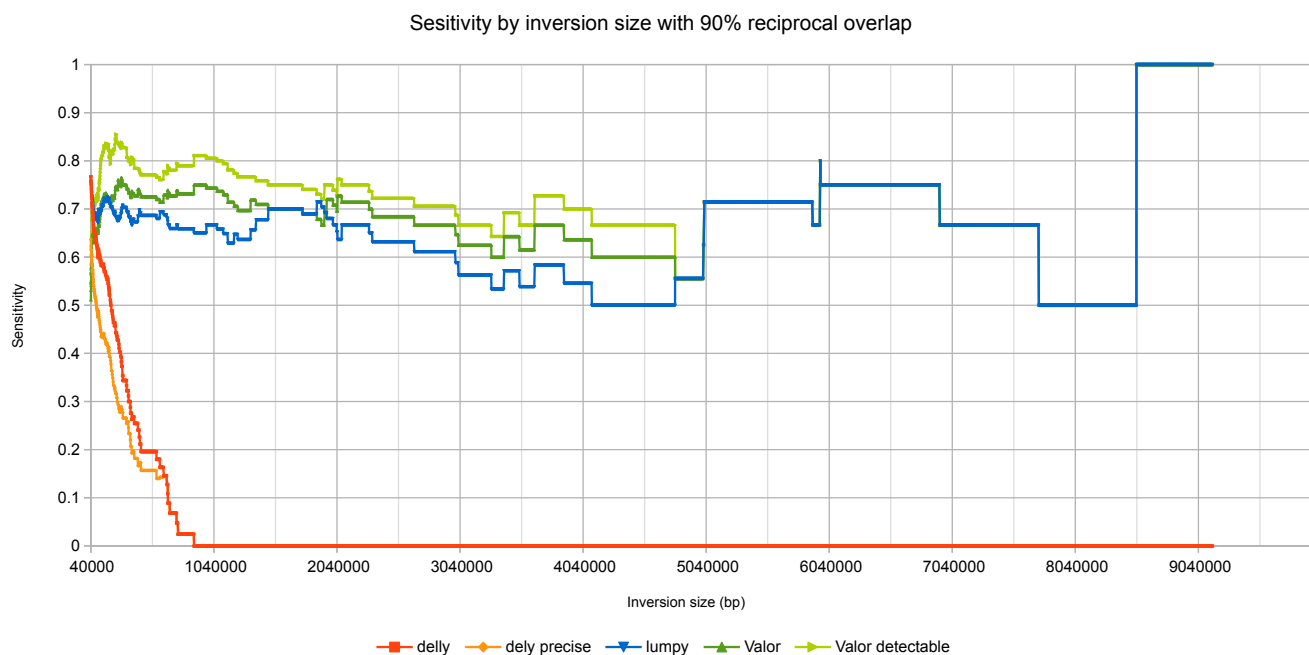

Supplementary Figure 13: Performance of WGS tools DELLY2 and LUMPY compared to VALOR on VarSim simulated data at 90% reciprocal intersection with BEDtools.

### 1.15 Statistics on the real data of the NA12878 individual

After simulations, VALOR was applied to the pooled clone data from the genome of the NA12878 individual. Some statistics on the data are given bellow.

Supplementary Table 30: Number and percentage of mapping paired-end reads before and after removing duplicated ones

| Set  | Before       | After       | Distinct | Duplicated |
|------|--------------|-------------|----------|------------|
| set1 | 382,782,082  | 324,302,909 | 84.72%   | 15.28%     |
| set2 | 223,707,355  | 190,888,484 | 85.33%   | 14.67%     |
| set3 | 420,380,434  | 383,907,969 | 91.32%   | 8.68%      |
| ALL  | 102,686,9871 | 899,099,362 | 87.56%   | 12.44%     |

Supplementary Table 31: Average number of normal size clones (125 Kbp-175 Kbp) inferred for each pool in each set vs. the expected number of clones

| Clones     | set1 | set2 | set3 |
|------------|------|------|------|
| Expected   | 230  | 389  | 153  |
| With 0s    | 162  | 238  | 76   |
| Without 0s | 179  | 305  | 152  |

*With 0* included the pools that had no inferred clones at all. Assuming that those probes might have been problematic, we also give the average numbers without including pools with zero clones as *Without 0*. The difference is due to error or split clones.

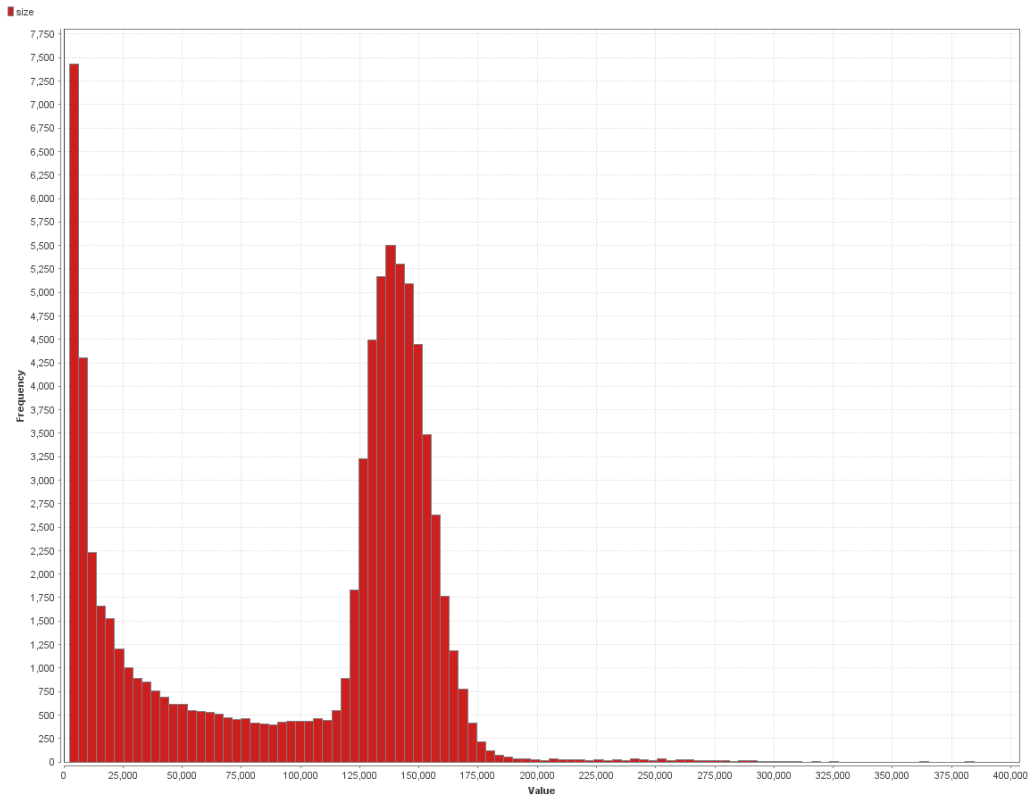

Supplementary Figure 14: Histogram of inferred clone size with 100 bins

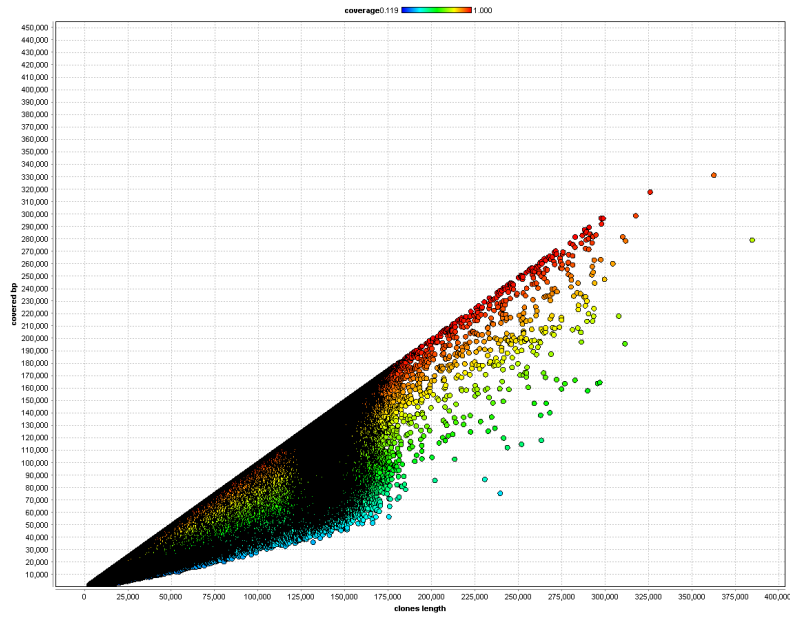

Supplementary Figure 15: Scatter plot of covered bp over clone size colored by coverage rate: It can be observed that clones of average size or larger are better covered

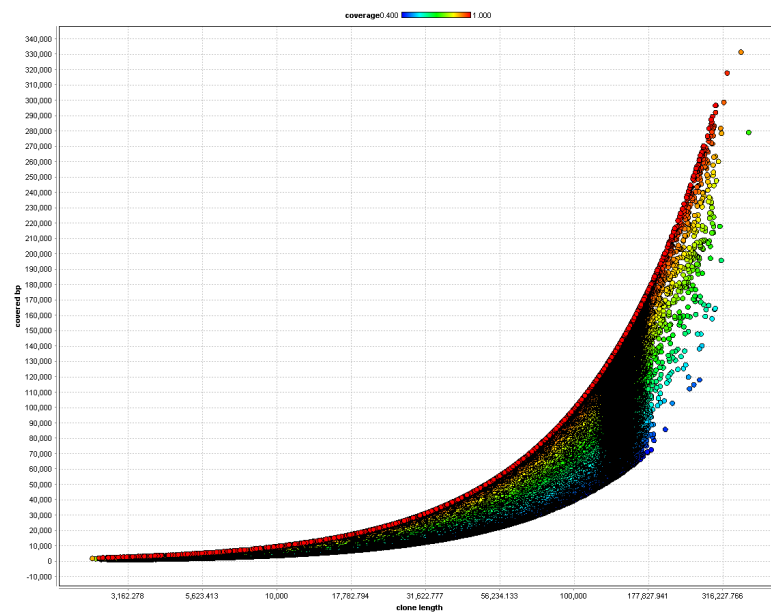

Supplementary Figure 16: Scatter plot of covered bp over log of clone length colored by coverage rate with cutoff of 40% coverage: It can be observed that clones of average size or larger are better covered

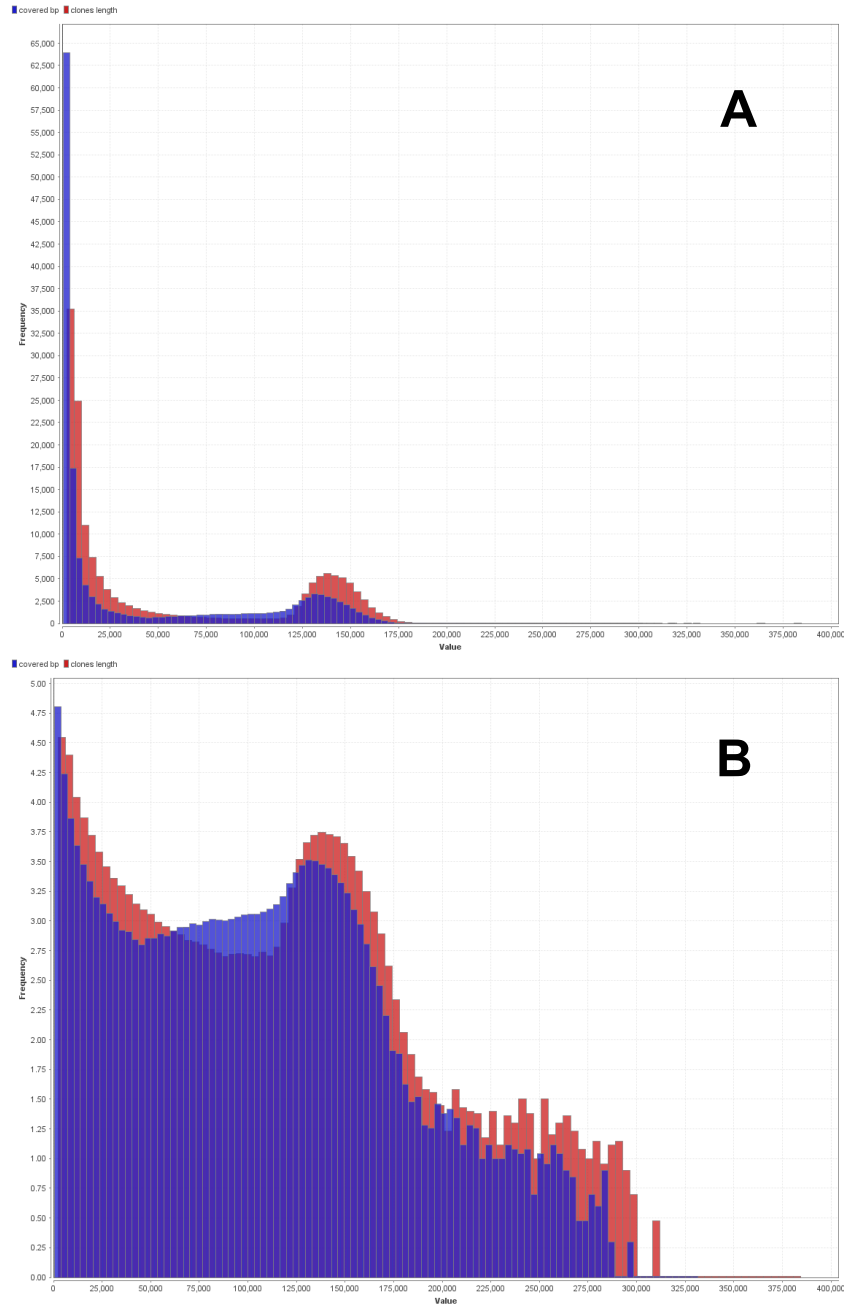

Supplementary Figure 17: (A) Histogram of covered bp over clone length with 100 bins and (B) Histogram of log of covered bp over log of clone length with 100 bins

### 1.16 Inversions predicted on the real data of the NA12878 individual

On the pooled BAC clones from the NA12878 genome, we aligned the paired-end reads using BWA-MEM and ran VALOR with the parameters (min and max inversions) set to 100 Kbp and 10 Mbp. After running VALOR and obtaining the clusters, we removed clusters with cluster size less than 2. The predicted inversion clusters are given in the Supplementary Table 32. For the sake of readability, we have assigned unique IDs to the inversions detected by VALOR (in coordinate-sorted order). AB and CD are the cluster sizes of split clones (see Supplementary figure 7) and pp and mm are the total reads supporting the inversion signature on the given breakpoints. The size is calculated as the difference of the outer coordinates. The confirmed inversions are given in bold font.

We also tried to lift the predicted inversion coordinated to hg18 to compare with InvFEST [8] using UCSC liftover tool<sup>3</sup>. The comparison is given in Supplementary Table 33. The lifted coordinates are given along with the InvFEST ID and the *status*, and finally the last column represents the *value* (where it was true or false). The *status* can be predicted or unreliable prediction, which InvFEST sets according to type of the prediction performed, or validated, which means it has been validated experimentally on the genome.

<sup>3</sup><https://genome.ucsc.edu/cgi-bin/hgLiftOver>

Supplementary Table 32: VALOR call set on pooled clone sequencing data of the NA12878 individual

| ID          | chrom        | left start        | left end          | right start       | right end         | AC       | BD       | pp        | mm        | size             |
|-------------|--------------|-------------------|-------------------|-------------------|-------------------|----------|----------|-----------|-----------|------------------|
| dS1         | chr1         | 13,124,363        | 13,142,580        | 13,638,653        | 13,639,171        | 1        | 2        | 1         | 2         | 514,808          |
| dS2         | chr1         | 16,845,976        | 16,923,473        | 17,125,650        | 17,192,698        | 3        | 7        | 2         | 7         | 346,722          |
| dS3         | chr1         | 142,670,981       | 142,673,939       | 143,163,791       | 143,170,513       | 5        | 10       | 9         | 5         | 499,532          |
| dS4         | chr1         | 143,676,334       | 143,702,036       | 147,849,843       | 147,882,344       | 5        | 3        | 22        | 29        | 4,206,010        |
| dS5         | chr1         | 144,700,347       | 144,710,164       | 144,960,069       | 144,976,473       | 2        | 4        | 4         | 4         | 276,126          |
| dS6         | chr1         | 144,830,507       | 144,834,248       | 146,471,573       | 146,478,344       | 2        | 1        | 1         | 2         | 1,647,837        |
| dS7         | chr1         | 146,002,094       | 146,006,716       | 147,489,038       | 147,548,595       | 1        | 2        | 4         | 5         | 1,546,501        |
| dS8         | chr1         | 146,443,133       | 146,449,819       | 148,300,929       | 148,304,686       | 14       | 2        | 1         | 4         | 1,861,553        |
| dS9         | chr1         | 149,364,330       | 149,371,254       | 149,749,621       | 149,756,945       | 22       | 16       | 15        | 10        | 392,615          |
| dS10        | chr2         | 90,471,094        | 90,486,252        | 91,692,053        | 91,759,768        | 3        | 1        | 4         | 3         | 1,288,674        |
| dS11        | chr4         | 49,132,791        | 49,149,263        | 49,633,433        | 49,642,387        | 70       | 78       | 129       | 175       | 509,596          |
| dS12        | chr5         | 68,874,516        | 68,915,972        | 69,729,710        | 69,771,119        | 2        | 26       | 15        | 7         | 896,603          |
| dS13        | chr5         | 69,113,005        | 69,196,224        | 70,030,035        | 70,067,890        | 2        | 3        | 20        | 6         | 954,885          |
| dS14        | chr7         | 57,690,113        | 57,696,922        | 57,884,934        | 57,892,632        | 1        | 3        | 1         | 5         | 202,519          |
| dS15        | chr7         | 61,163,477        | 61,215,788        | 61,431,150        | 61,433,283        | 1        | 2        | 4         | 7         | 269,806          |
| dS16        | chr7         | 64,603,898        | 64,651,022        | 64,998,550        | 65,065,573        | 1        | 3        | 7         | 5         | 461,675          |
| dS17        | chr7         | 72,515,193        | 72,533,307        | 74,308,848        | 74,342,804        | 1        | 52       | 5         | 3         | 1,827,611        |
| dS18        | chr7         | 76,161,926        | 76,165,992        | 76,600,868        | 76,680,815        | 5        | 1        | 1         | 1         | 518,889          |
| <b>dS19</b> | <b>chr8</b>  | <b>6,977,308</b>  | <b>7,070,893</b>  | <b>12,442,860</b> | <b>12,449,094</b> | <b>6</b> | <b>4</b> | <b>6</b>  | <b>3</b>  | <b>5,471,786</b> |
| dS20        | chr8         | 7,453,968         | 7,524,896         | 7,901,867         | 7,906,817         | 2        | 1        | 3         | 1         | 452,849          |
| dS21        | chr8         | 11,968,472        | 12,065,748        | 12,214,705        | 12,308,281        | 4        | 3        | 4         | 3         | 339,809          |
| dS22        | chr9         | 39,396,867        | 39,397,779        | 39,926,408        | 39,927,022        | 3        | 1        | 1         | 3         | 530,155          |
| dS23        | chr9         | 39,610,566        | 39,619,240        | 47,034,631        | 47,035,047        | 2        | 2        | 5         | 3         | 7,424,481        |
| dS24        | chr9         | 39,846,127        | 39,877,872        | 41,461,480        | 41,492,209        | 1        | 2        | 5         | 1         | 1,646,082        |
| dS25        | chr9         | 41,095,170        | 41,193,239        | 43,453,524        | 43,511,328        | 1        | 2        | 4         | 1         | 2,416,158        |
| dS26        | chr9         | 41,969,157        | 41,980,937        | 44,224,992        | 44,277,305        | 1        | 5        | 3         | 3         | 2,308,148        |
| dS27        | chr9         | 44,995,173        | 44,999,871        | 45,727,935        | 45,728,840        | 3        | 12       | 7         | 23        | 733,667          |
| dS28        | chr9         | 45,736,367        | 45,753,162        | 46,090,666        | 46,139,443        | 3        | 5        | 5         | 2         | 403,076          |
| dS29        | chr9         | 66,717,901        | 66,742,433        | 69,897,210        | 69,921,583        | 8        | 11       | 14        | 20        | 3,203,682        |
| dS30        | chr9         | 69,690,071        | 69,747,623        | 70,378,781        | 70,388,661        | 1        | 5        | 1         | 2         | 698,590          |
| dS31        | chr10        | 17,837,717        | 17,892,080        | 18,084,807        | 18,139,005        | 8        | 3        | 2         | 7         | 301,288          |
| dS32        | chr10        | 46,627,777        | 46,682,629        | 48,855,724        | 48,871,218        | 1        | 2        | 6         | 6         | 2,243,441        |
| dS33        | chr14        | 19,427,037        | 19,429,945        | 20,129,457        | 20,134,420        | 4        | 5        | 4         | 8         | 707,383          |
| dS34        | chr15        | 20,305,613        | 20,311,845        | 21,285,111        | 21,318,365        | 3        | 5        | 6         | 8         | 1,012,752        |
| <b>dS35</b> | <b>chr15</b> | <b>30,727,982</b> | <b>30,823,312</b> | <b>32,859,062</b> | <b>32,864,779</b> | <b>1</b> | <b>2</b> | <b>17</b> | <b>8</b>  | <b>2,136,797</b> |
| dS36        | chr16        | 14,948,016        | 15,030,478        | 16,396,932        | 16,472,694        | 8        | 6        | 8         | 15        | 1,524,678        |
| <b>dS37</b> | <b>chr16</b> | <b>16,704,632</b> | <b>16,722,093</b> | <b>18,732,305</b> | <b>18,759,138</b> | <b>2</b> | <b>2</b> | <b>14</b> | <b>10</b> | <b>2,054,506</b> |
| dS38        | chr16        | 21,461,477        | 21,482,090        | 21,893,378        | 21,913,853        | 34       | 12       | 17        | 17        | 452,376          |
| dS39        | chr16        | 21,853,565        | 21,863,712        | 30,241,620        | 30,251,974        | 2        | 17       | 11        | 4         | 8,398,409        |
| dS40        | chr16        | 32,663,146        | 32,672,648        | 33,236,085        | 33,270,553        | 13       | 14       | 46        | 5         | 607,407          |
| <b>dS41</b> | <b>chr17</b> | <b>34,508,335</b> | <b>34,572,064</b> | <b>36,296,916</b> | <b>36,330,960</b> | <b>3</b> | <b>2</b> | <b>16</b> | <b>21</b> | <b>1,822,625</b> |
| dS42        | chr17        | 44,372,193        | 44,400,349        | 44,577,375        | 44,618,085        | 14       | 1        | 9         | 11        | 245,892          |
| dS43        | chrX         | 52,117,948        | 52,191,606        | 52,395,583        | 52,466,291        | 1        | 4        | 1         | 1         | 348,343          |

The callset of VALOR on the total 288 pools of PCS data of the NA12878 genome. Parameters (min and max inversion size) were set to 100 Kbp and 10 Mbp. VALOR outputs 2 coordinates for each breakpoint. AB: the cluster size of the AC split clones. CD: the cluster size of the BD split clones. pp: number of paired-reads mapping on the same strand (direct) supporting the breakpoint intervals. mm: number of paired-reads mapping to the same strand (reverse) supporting the breakpoint intervals. size: the difference of the outer coordinates of the inversion. The inversions with cluster size < 2 were filtered out due to low quality of the data. Inversions in bold are the confirmed ones.



Supplementary Table 33: Comparison of inversions called by VALOR on the NA12878 genome to InvFEST database

| ID   | chrom | lifted start | lifted end | InvFEST ID                                 | status     | value      |
|------|-------|--------------|------------|--------------------------------------------|------------|------------|
| dS12 | chr5  | 68,910,272   | 69,806,875 |                                            |            |            |
| dS13 | chr5  | 69,148,761   | 70,103,646 | HsInv0690                                  | P          | 0          |
| dS14 | chr7  | 57,694,055   | 57,896,574 |                                            |            |            |
| dS16 | chr7  | 64,241,333   | 64,703,008 | HsInv0299                                  | P          | 0          |
| dS17 | chr7  | 72,153,129   | 73,980,740 |                                            |            |            |
| dS18 | chr7  | 75,999,862   | 76,518,751 |                                            |            |            |
| dS19 | chr8  | 6,964,718    | 12,493,465 | HsInv0501                                  | V          | 1          |
| dS33 | chr14 | 18,497,037   | 19,204,260 | HsInv0537, HsInv0761, HsInv0765            | P, U, U    | 0, 0, 0    |
| dS34 | chr15 | 18,565,627   | 19,583,024 | HsInv0770                                  | U          | 0          |
| dS35 | chr15 | 28,515,274   | 30,652,071 | HsInv1049                                  | V          | 1          |
| dS36 | chr16 | 14,855,517   | 16,380,195 | HsInv0365, HsInv0551, HsInv0780            | U, U, P    | 0, 1, 1/0  |
| dS37 | chr16 | 16,612,133   | 18,666,639 | HsInv0362, HsInv0368, HsInv0369, HsInv0560 | U, P, U, P | 0, 0, 0, 0 |
| dS38 | chr16 | 21,368,978   | 21,821,354 |                                            |            |            |
| dS39 | chr16 | 21,761,066   | 30,159,475 |                                            |            |            |
| dS40 | chr16 | 32,570,647   | 33,178,054 |                                            |            |            |
| dS41 | chr17 | 31,532,448   | 33,534,539 | HsInv1048                                  | V          | 0, 0, 0    |
| dS42 | chr17 | 41,727,970   | 41,973,401 |                                            |            |            |

Inversions predicted in Supplementary Table 32 were lifted to hg18 coordinated in order to look them up in InvFEST database. 17 of them could be lifted with  $\geq 95\%$  precision. The lifted outer coordinates are given in column 2 and 3, the InvFEST ID is given in the fourth column. Column status is the InvFEST status (P: predicted, U: unreliable prediction, V :validated). Column value shows whether the inversion was predicted/validates on the NA12878 genome (0: false, 1: true). In case of several InvFEST entries, they have been separated by commas. Value x/y means the prediction was done on each breakpoint separately (x:value on left breakpoint, y: value on right breakpoint).

\* HsInv0496, HsInv0497, HsInv0712, and HsInv0713 also correspond to inversion dS19, but because their coordinates were duplicates, we excluded them.

17 inversions could be lifted with  $\geq 95\%$  precision, out of which 9 were overlapping  $\geq 50\%$  on breakpoints with 16 InvFEST inversions, excluding dS19 inversion which is repeated 4 more times with the same coordinates. Another mistake is that InvFEST indicated inversion dS41 has been validated to be STD/STD but Antonacci et. al. (2009) have validated it in their work.

### 1.17 FISH validations

We chose a set of the predicted inversions and tried to validate the with FISH experiments.

Supplementary Table 34: Summary of FISH results on inversions predicted in the genome of NA12878 using dipSeq.

| ID   | chrom | start      | end        | size      | result               |
|------|-------|------------|------------|-----------|----------------------|
| ds13 | chr5  | 69,080,890 | 70,004,538 | 4,214,658 | <i>not tested</i>    |
| ds33 | chr14 | 19,369,507 | 20,154,427 | 1,336,417 | <i>not tested</i>    |
| ds37 | chr16 | 16,722,093 | 18,732,305 | 2,010,212 | confirmed            |
| ds39 | chr16 | 21,847,556 | 30,283,910 | 883,731   | <i>not confirmed</i> |
| ds40 | chr16 | 32,277,947 | 33,295,746 | 1,090,400 | <i>not tested</i>    |

*not tested*: The inversion was not tested because they were located on Segmental Duplications.

## 1.18 Extra files

The comparison results mentioned in the paper can be found under the supplementary folder. The genomes studied are grouped into sub folders:

- **CHM1** – 11 files
- **NA12877** – 6 files
- **NA12878** – 12 files
- **NA12882** – 6 files
- **simulation/varsim1** – 6 files
- **simulation/varsim2** – 4 files

In each case the format is: `[tool][genome][reference].[fileformat]`

Tools are DELLY2, LUMPY, and GASVPro. In case of the CHM1 genome, the reads were mapped to both GRCh37 reference and the CHM1 assembly. In the rest of the data, the reference is GRCh37. GASVPro outputs 4 breakpoints for each inversion, the files suffixed with *inner* use the inner breakpoints and *outer* give the outer breakpoints to create bed formats. bed formats are required to compare against the truth set.

For CHM1 there is a truth set of inversions tested by the authors which we downloaded and is available in *inversions\_truth.bed* file.

In case of NA12878, we examined two data sets, one older PCR data with lower quality, and another with higher quality and PCR-free.

In all cases reads were mapped by BWA-MEM to the reference, duplicate reads were removed with Picard, and the remaining were realigned around indels with GATK.

## References

- [1] Li, H., Durbin, R.: Fast and accurate short read alignment with Burrows-Wheeler transform. *Bioinformatics* **25**(14), 1754–1760 (2009). doi:10.1093/bioinformatics/btp324
- [2] Xin, H., Lee, D., Hormozdiari, F., Yedkar, S., Mutlu, O., Alkan, C.: Accelerating read mapping with FastHASH. *BMC Genomics* **14 Suppl 1**, 13 (2013). doi:10.1186/1471-2164-14-S1-S13
- [3] Brunato, M., Hoos, H.H., Battiti, R.: In: Maniezzo, V., Battiti, R., Watson, J.-P. (eds.) *On Effectively Finding Maximal Quasi-cliques in Graphs*, pp. 41–55. Springer, Berlin, Heidelberg (2008). doi:10.1007/978-3-540-92695-5\_4. [http://dx.doi.org/10.1007/978-3-540-92695-5\\_4](http://dx.doi.org/10.1007/978-3-540-92695-5_4)
- [4] Hormozdiari, F., Alkan, C., Eichler, E.E., Sahinalp, S.C.: Combinatorial algorithms for structural variation detection in high-throughput sequenced genomes. *Genome Res* **19**(7), 1270–1278 (2009). doi:10.1101/gr.088633.108
- [5] Fiume, M., Smith, E.J.M., Brook, A., Strbenac, D., Turner, B., Mezlini, A.M., Robinson, M.D., Wodak, S.J., Brudno, M.: Savant genome browser 2: visualization and analysis for population-scale genomics. *Nucleic Acids Res* **40**(Web Server issue), 615–621 (2012). doi:10.1093/nar/gks427
- [6] Layer, R.M., Chiang, C., Quinlan, A.R., Hall, I.M.: LUMPY: a probabilistic framework for structural variant discovery. *Genome Biol* **15**(6), 84 (2014). doi:10.1186/gb-2014-15-6-r84
- [7] Rausch, T., Zichner, T., Schlattl, A., Stütz, A.M., Benes, V., Korbel, J.O.: DELLY: structural variant discovery by integrated paired-end and split-read analysis. *Bioinformatics* **28**(18), 333–339 (2012). doi:10.1093/bioinformatics/bts378
- [8] Martínez-Fundichely, A., Casillas, S., Egea, R., Ràmia, M., Barbadilla, A., Pantano, L., Puig, M., Cáceres, M.: InvFEST, a database integrating information of polymorphic inversions in the human genome. *Nucleic Acids Res* **42**(Database issue), 1027–1032 (2014). doi:10.1093/nar/gkt1122
